1 **New flat embedding method for transmission electron microscopy reveals an**  
2 **unknown mechanism of tetracycline**

3

4 Michaela Wenzel<sup>1,2,#,\*</sup>, Marien P. Dekker<sup>3</sup>, Biwen Wang<sup>1</sup>, Maroeska J. Burggraaf<sup>2</sup>, Wilbert  
5 Bitter<sup>2,4</sup>, Jan R. T. van Weering<sup>3,\*</sup>, Leendert W. Hamoen<sup>1,\*</sup>

6

7 <sup>1</sup>Bacterial Cell Biology, Swammerdam Institute for Life Sciences, University of  
8 Amsterdam, 1098 XH Amsterdam, The Netherlands

9 <sup>2</sup>Department of Medical Microbiology and Infection Control, Amsterdam University  
10 Medical Centers - Location VUMC, 1081 HZ Amsterdam, The Netherlands

11 <sup>3</sup>Department of Clinical Genetics, Center for Neurogenomics and Cognitive Research  
12 (CNCR), Amsterdam Neuroscience, Amsterdam University Medical Centers - Location  
13 VUMC, 1081 HZ Amsterdam, The Netherlands

14 <sup>4</sup>Department of Molecular Cell Biology, Amsterdam Institute for Molecules, Medicines,  
15 and Systems, Faculty of Science, Vrije Universiteit Amsterdam, 1081 HZ Amsterdam, The  
16 Netherlands

17

18 \*Corresponding authors: Michaela Wenzel ([wenzelm@chalmers.se](mailto:wenzelm@chalmers.se)), Jan van Weering  
19 ([jan.van.weering@vu.nl](mailto:jan.van.weering@vu.nl)), and Leendert Hamoen ([l.w.hamoen@uva.nl](mailto:l.w.hamoen@uva.nl))

20 #Current address: Chemical Biology, Department for Biology and Biological Engineering,  
21 Chalmers University of Technology, 41296 Gothenburg, Sweden

22

23 **Author Contributions**

24 Experimental planning and execution: MW, MPD, BW, MJB; Resources: WB, JRTvW;  
25 Study design: MW, JRTvW, LWH; Writing: MW, LWH.

26

## 27 **Abstract**

28 Transmission electron microscopy (TEM) is an important imaging technique in bacterial  
29 research and requires ultrathin sectioning of resin embedding of cell pellets. This method  
30 consumes milli- to deciliters of culture and results in sections of randomly orientated cells.  
31 For rod-shaped bacteria, this makes it exceedingly difficult to find longitudinally cut cells,  
32 which precludes large-scale quantification of morphological phenotypes. Here, we  
33 describe a new fixation method using either thin agarose layers or carbon-coated glass  
34 surfaces that enables flat embedding of bacteria. This technique allows for the observation  
35 of thousands of longitudinally cut rod-shaped cells per single section and requires only  
36 microliter culture volumes. We successfully applied this technique to Gram-positive  
37 *Bacillus subtilis*, Gram-negative *Escherichia coli*, the tuberculosis vaccine strain  
38 *Mycobacterium bovis* BCG, and the cell wall-lacking mycoplasma *Acholeplasma*  
39 *laidlawii*. To assess the potential of the technique to quantify morphological phenotypes,  
40 we examined cellular changes induced by a panel of different antibiotics. Surprisingly, we  
41 found that the ribosome inhibitor tetracycline causes significant deformations of the cell  
42 membrane. Further investigations showed that the presence of tetracycline in the cell  
43 membrane changes membrane organization and affects the peripheral membrane proteins  
44 MinD, MinC, and MreB, which are important for regulation of cell division and elongation.  
45 Importantly, we could show that this effect is not the result of ribosome inhibition but is a

46 secondary antibacterial activity of tetracycline that has defied discovery for more than 50  
47 years.

#### 48 **Significance**

49 Bacterial antibiotic resistance is a serious public health problem and novel antibiotics are  
50 urgently needed. Before a new antibiotic can be brought to the clinic, its antibacterial  
51 mechanism needs to be elucidated. Transmission electron microscopy is an important tool  
52 to investigate these mechanisms. We developed a flat embedding method that enables  
53 examination of many more bacterial cells than classical protocols, enabling large-scale  
54 quantification of phenotypic changes. Flat embedding can be adapted to most growth  
55 conditions and microbial species and can be employed in a wide variety of microbiological  
56 research fields. Using this technique, we show that even well-established antibiotics like  
57 tetracycline can have unknown additional antibacterial activities, demonstrating how flat  
58 embedding can contribute to finding new antibiotic mechanisms.

## 59 **Introduction**

60

61 Transmission electron microscopy (TEM) is a powerful tool to examine the morphology  
62 and ultrastructure of bacterial cells. There are many bacterial embedding protocols for  
63 TEM (1–5), but the basic procedure, i.e. embedding of cell pellets as small nuggets into  
64 resin blocks, has not changed since the beginning of electron microscopy research on  
65 bacteria 60 years ago (4, 6, 7). This technique has two major shortcomings. Most  
66 importantly, it results in random orientations of cells in the ultrathin sections. This is a  
67 critical limitation when examining rod-shaped and other non-cocoid bacterial species,  
68 since the vast majority of cells are randomly cross-sectioned, and the number of complete  
69 longitudinally cut cells is generally so low that robust quantification and population-wide  
70 studies are not feasible. Another limitation is that acquiring a concentrated cell pellet often  
71 requires relatively large culture volumes typically in the range of 10 to 50 ml (6, 8, 9). This  
72 can be problematic when studying the mode of action of experimental antimicrobial  
73 compounds, whose synthesis or purification is laborious and expensive.

74           We have addressed these problems by developing a novel embedding  
75 technique that enables observation of a large number of cells oriented in one plane by  
76 immobilizing bacterial samples on a flat surface of either agarose or glass. This relatively  
77 simple method does not require any expensive equipment and can be adapted for any  
78 microorganism. We have successfully used this method with the Gram-positive bacterium  
79 *Bacillus subtilis*, the Gram-negative bacterium *Escherichia coli*, the tuberculosis vaccine  
80 strain *Mycobacterium bovis* BCG, and the cell wall-less mycoplasma species  
81 *Acholeplasma laidlawii*. This flat embedding technique allowed the quantification of

82 morphological changes in bacteria treated with different antibiotics. This led to the  
83 surprising discovery that the well-known ribosome inhibitor tetracycline does not only  
84 block translation but also directly disturbs the bacterial cell membrane. This additional  
85 mechanism of action has remained hidden for over 50 years despite the fact that  
86 tetracyclines are one of the most commonly used antibiotic groups in both human and  
87 veterinary medicine (10).

88

## 89 **Results**

90

### 91 Alignment of cells on agarose

92 Light microscopy studies of bacteria commonly use thin agarose layers to immobilize cells  
93 (11, 12). If done correctly, these cells are well-aligned in a single plane, allowing large-  
94 scale quantification of phenotypic changes. We wondered whether this immobilization  
95 technique could be adapted for TEM embedding, which would solve the issue of randomly  
96 sectioned bacteria and at the same time drastically reduce the required sample volume.  
97 Using rod-shaped *B. subtilis* cells as model sample, we tested different conditions,  
98 eventually resulting in the following flat embedding procedure. As little as 50-150  $\mu$ l of  
99 logarithmically growing ( $OD_{600} = 0.4$ ) *B. subtilis* culture was pelleted, resuspended in 5-  
100 15  $\mu$ l medium and spotted on a thin, flat layer of 1.5% agarose (Figure 1A, Supplementary  
101 Movies 1 and 2). After evaporation of excess liquid, the immobilized cells were subjected  
102 to a standard sequence of fixation, staining, dehydration, and finally resin embedding,  
103 resulting in an EPON disc carrying the flat embedded bacteria (Supplementary Figure 1).  
104 Some cells were washed off during the procedure, but the majority remained attached to

105 the agarose and was successfully embedded. As shown in Figure 1B, cells were generally  
106 well-aligned in the resulting ultrathin sections. Only 5 images of a single ultrathin section  
107 were sufficient to examine more than 900 individual fully longitudinally sectioned cells  
108 (5000x magnification). When we examined TEM pictures of bacteria prepared with the  
109 classical pellet embedding method, we found on average only 6 fully longitudinally  
110 sectioned bacteria per image (Figure 1B). Even filamentous cell division mutants, which  
111 normally pose a particular challenge for TEM, could be efficiently sectioned longitudinally  
112 using this new flat embedding protocol (Supplementary Figure 2).

113

#### 114 Flat embedding applied to different bacteria

115 To examine whether flat embedding is applicable to a wider range of microorganisms, we  
116 tested bacterial species with different cell surface properties. *E. coli* was chosen as  
117 representative of Gram-negative bacteria, *M. bovis* BCG as representative of bacteria with  
118 a mycolic acid-containing outer membrane, and *A. laidlawii* as a cell wall-less mycoplasma  
119 species. Both *E. coli* and *A. laidlawii* were easy to embed on agarose (Figure 2A). However,  
120 *M. bovis* BCG was easily washed off the agarose surface during subsequent washing and  
121 fixation steps, resulting in only very few cells being left on the final sections. Typically,  
122 *M. bovis* BCG is grown in the presence of detergent (Tween 80) to reduce clumping and to  
123 facilitate microscopic observation of single cells (13, 14). However, the presence of  
124 detergent might reduce the mycobacterial capsule and affect cell morphology (13, 15–20),  
125 and we hypothesized that it might also affect the attachment of the cells to the agarose  
126 patch. However, growing *M. bovis* BCG without detergent did not improve attachment to  
127 the agarose surface. On the contrary, clumping cells detached even more readily and could

128 not be embedded with this method. To overcome this problem, we developed an agarose  
129 sandwich approach. To this end, cells were covered with a second thin layer of agarose  
130 after spotting on the first flat agarose layer (Figure 1A, Supplementary Movie 2). Using  
131 this approach, we were able to easily embed both detergent-treated and detergent-free  
132 cultures of *M. bovis* (Figure 2B). Thus, flat agarose patches can be used to immobilize a  
133 wide variety of bacterial cells in a single plane for longitudinal TEM sectioning.

134

#### 135 Flat embedding on carbon-coated glass surfaces

136 While flat embedding on agarose was easy and straight-forward, it can be time-consuming  
137 to find the perfect plane during ultrathin-sectioning. To facilitate this step, we developed  
138 an alternative embedding method by spotting cells onto a carbon-coated glass cover slip  
139 (Figure 1A). The carbon film was applied to better visualize the bacteria during sectioning.  
140 After embedding, the glass was removed from the polymerized resin, leaving the cells very  
141 close to the surface of the EPON disc. This, and the easy localization of the cells due to the  
142 contrast of the dark carbon film greatly facilitated finding the right section plane. Since  
143 only cells and no agarose patches have to be dehydrated in this protocol, it is significantly  
144 faster at the embedding stage as well. It also eliminates the risk of artefacts caused by  
145 insufficient dehydration of the agarose film, which can complicate sectioning and produces  
146 ‘waves’ in the sections. As shown in Figure 2C, embedding on glass worked for all tested

147 species and resulted in flat, clean, and nicely sectioned samples. However, cells detached  
148 easier from glass than from the agarose surface, resulting in less cells in the final sections.

149

#### 150 Antibiotic mode of action studies

151 Our new flat embedding method enables a quantitative approach to monitor antibiotic-  
152 induced cell damage using TEM. To demonstrate this, we counted antibiotic-induced  
153 phenotypic changes in at least 100 *B. subtilis* cells caused by a panel of well-characterized  
154 antimicrobial compounds, including vancomycin, ampicillin, daptomycin, MP196,  
155 nitrofurantoin and tetracycline. Concentrations were used that clearly reduced the growth  
156 rate without causing extensive cell lysis (Supplementary Table 1, Supplementary Figure  
157 3). After incubation of cultures with the selected antibiotic concentrations for 30 min,  
158 samples were embedded using the single layer agarose approach. Typical examples of cells  
159 exhibiting cellular aberrations that are characteristic for the individual antibiotics are  
160 shown in Supplementary Figure 4. While ampicillin, daptomycin and MP196 caused the  
161 expected phenotype (see legend of Supplementary Figure 4 for details), vancomycin,  
162 nitrofurantoin and tetracycline displayed unexpected phenotypes and were chosen for  
163 further analysis. Vancomycin, a last line of defense antibiotic for systemic Gram-positive  
164 infections, binds to the peptidoglycan precursor molecule lipid II (21). Cells treated with  
165 this antibiotic showed characteristic cell envelope lesions that are indicative of aberrant  
166 cell wall synthesis. However, only in 32% of cells vancomycin-induced lesions occurred  
167 at the cell periphery, while in 44% of the cells, they were located at cell poles and 22% at  
168 cell division septa (Figure 3C). The locally increased concentration of lipid II at developing



169 septa (22) might explain the higher proportion of lesions occurring at new and old cell  
170 division sites, i.e. cell poles.

171 Nitrofurantoin is an antibiotic that is widely used against urinary tract  
172 infections since 1953, but its mechanism is still not fully understood. It is thought to  
173 damage DNA, RNA, proteins, and other macromolecules by a mechanism involving  
174 oxidative damage (23). Interestingly, in our TEM images 74% of cells treated with  
175 nitrofurantoin seemed to entirely lack a nucleoid, whereas the other 26% showed  
176 condensed remnants of chromosomes (Figure 3D,E). To confirm this finding, cells were  
177 stained with the fluorescent DNA dye DAPI and examined by fluorescence light  
178 microscopy. Already after 5 min of treatment cells started to show condensed nucleoids  
179 (Supplementary Figure 5) and after 30 min the DAPI signal became completely diffuse  
180 (Figure 3F). The TEM images also showed accumulation of small membrane vesicles  
181 (Supplementary Figure 4) and 50% of cells also showed fluorescent membrane patches  
182 when stained with the membrane dye Nile red (Figure 3F). Both DNA and lipids are  
183 sensitive to oxidative damage (24–26) and our results corroborate the current model of  
184 nitrofurantoin action.

185 The commonly used antibiotic tetracycline is known to inhibit protein  
186 biosynthesis by blocking binding of the aminoacyl-tRNA to the ribosome (10, 27).  
187 Interestingly, 90% of tetracycline-treated cells exhibited cellular lesions in the TEM  
188 images reminiscent of membrane invaginations (Figure 3G,H). The majority of these

189 (69%) were visibly membrane-associated (Figure 3I). These results may suggest that  
190 tetracycline does not only target the ribosome but also affects the bacterial cell membrane.

191

#### 192 Tetracycline is a membrane-active compound

193 To investigate the effect of tetracycline on bacterial cell membranes in more detail, we  
194 tested whether we could observe membrane deformations with fluorescence microscopy  
195 using the membrane dye Nile red. As shown in Figure 4A, tetracycline indeed caused  
196 aberrant, highly fluorescent membrane patches in 93% of cells (Supplementary Figure 6).  
197 We were able to localize the antibiotic directly due to its green autofluorescence, which  
198 appeared to overlap with Nile-red stained membrane foci (Figure 4A). This irregular green  
199 fluorescence membrane staining was also observed in cells that were not stained with Nile  
200 red (Supplementary Figure 7), indicating that it is not a fluorescence bleed-through artifact  
201 from the membrane dye.

202           The TEM images suggested that the highly fluorescent Nile red patches are  
203 likely caused by the accumulation of extra membrane material due to membrane  
204 invaginations (28–30) (Figure 3A, Supplementary Figures 4). To confirm this, we  
205 increased the fluorescence microscopy resolution by employing Structured Illumination  
206 Microscopy (SIM). This revealed clear membrane invaginations after treatment with  
207 tetracycline (Figure 4B).

208           The tetracycline analogue anhydrotetracycline is broadly applied in molecular  
209 genetics as inducer of Tet repressor-based gene expression systems (31, 32), since it is  
210 widely believed not to inhibit translation or bacterial growth (33). Interestingly, incubation  
211 of *B. subtilis* cells with anhydrotetracycline also caused fluorescent Nile red foci that

212 appear to be caused by membrane invaginations (Figure 4A-B, Supplementary Figure 6,7).  
213 These results confirmed our observations by TEM (Supplementary Figure 4,8), suggesting  
214 that tetracycline affects the bacterial cell membrane independently from the inhibition of  
215 protein translation.

216

#### 217 Tetracycline affects membrane protein localization

218 To test whether tetracycline functionally disturbs the cell membrane, we examined the  
219 localization of three peripheral membrane proteins that are known to be affected by  
220 membrane depolarization, MinC, MinD and MreB (34, 35). MinD interacts with MinC to  
221 form a complex that inhibits initiation of cell division at the cell poles (36). Using a strain  
222 that expresses a GFP fusion to MinD and an mcherry fusion to MinC (37), we observed  
223 that the localization of both proteins was severely disturbed by both tetracycline and  
224 anhydrotetracycline after only 5 min of treatment (Figure 5A). MreB is an actin homologue  
225 that forms dynamic polymers along the lateral membrane and coordinates lateral cell wall  
226 synthesis (38). Tetracycline slightly affected localization of MreB and caused gaps in the  
227 normally regular localization pattern of this protein (Figure 5B). Anhydrotetracycline  
228 caused a much more dramatic effect and completely delocalized MreB resulting in diffuse  
229 fluorescence signal and large local clusters (Figure 5B).

230

#### 231 Tetracycline does not dissipate the membrane potential

232 Since the localization of MinC, MinD, and MreB depends on the membrane potential, we  
233 wondered whether tetracycline depolarizes the cell membrane. This was tested using the  
234 voltage-sensitive probe DiSC(3)5, which accumulates in bacterial cells in a membrane

235 potential-dependent manner (11). As shown in Figure 5C, no depolarization of the cell  
236 membrane was observed, even after 30 min of incubation. Anhydrotetracycline caused only  
237 a slight membrane depolarization. The latter effect was not due to the presence of a subset  
238 of cells that had lost their membrane potential (Supplementary Figures 9-11). These results  
239 show tetracyclines disturb the bacterial cell membrane by a mechanism that is unrelated to  
240 membrane permeabilization.

241

#### 242 Tetracycline disturbs membrane organization

243 Bacteria can contain specific membrane regions of increased fluidity called RIFs (38, 39).  
244 RIFs contain fluidizing lipid species, e.g. with short, branched or unsaturated fatty acid  
245 chains. Since insertion of a membrane anchor into a lipid bilayer is facilitated in a more  
246 fluid environment, RIFs are enriched in certain peripheral membrane proteins (38, 40, 41).  
247 MreB is associated with RIFs (38) and its observed delocalization could be an indication  
248 that tetracycline affects these lipid domains. RIFs can be visualized with the fluidity-  
249 sensitive dye DiIC12 (12, 38). As shown in Figure 5D, tetracycline, and especially  
250 anhydrotetracycline, affected the formation of RIFS in a different manner than the  
251 membrane-depolarizing peptide gramicidin. Thus, the delocalization of MinCD and MreB  
252 is a consequence of the distortion of lipid organization by the tetracyclines, and not because  
253 of membrane depolarization.

254

#### 255 Membrane activity is independent of ribosome inhibition

256 Several observations suggested that tetracycline directly targets the bacterial cell  
257 membrane independently from inhibition of ribosomes. Firstly, the antibiotic visibly

258 accumulated in the membrane lesions observed by fluorescent microscopy (Figure 4A).  
259 Secondly, the localization of membrane proteins was affected after a short treatment time  
260 (Figure 5). Thirdly, membrane deformations caused by tetracycline are largely similar of  
261 those of anhydrotetracycline (Figures 4 and 5, Supplementary Figures 4,6-8). As an  
262 additional control, we tested the effects of the translation inhibitors chloramphenicol and  
263 kanamycin on membrane organization. Neither chloramphenicol nor kanamycin caused  
264 membrane invaginations, affected the localization of MinCD and MreB, or affected RIFS  
265 (Supplementary Figure 12-15).

266           Finally, we analyzed two different tetracycline-resistant strains, the *tet-4*  
267 point mutation in the ribosomal protein S10, which reduces the tetracycline sensitivity of  
268 the ribosome (42, 43), and a strain containing the *tetL* resistance cassette, which encodes  
269 the TetA tetracycline transporter and confers high-level tetracycline resistance (44). If the  
270 effects of tetracycline on the membrane are a consequence of ribosome inhibition, they  
271 should be absent in both the *tet-4* and *tetL* mutant. As shown in Figure 6, membrane  
272 distortions were still clearly visible in the *tet-4* mutant, indicating that the interaction of  
273 tetracycline with ribosomes is not required for its membrane activity. In contrast, the *tetL*  
274 mutant showed no membrane lesions, which makes sense since TetA is an efflux pump  
275 that removes tetracycline from the membrane (44).

276

## 277 **Discussion**

278

279 Here we described a new method for embedding bacterial cells in a single layer to facilitate  
280 observation by TEM. This technique enabled us to observe high numbers of longitudinally

281 cut bacterial cells and revealed a new antibacterial mechanism of tetracycline, which is  
282 independent from its ability to inhibit the ribosome. The membrane-distorting effect of  
283 tetracycline resulted in the complete delocalization of the cell division-regulatory protein  
284 couple MinCD, which could explain an earlier observation that certain *B. subtilis* cell  
285 division mutants are hypersensitive to tetracycline, a phenomenon that was also  
286 independent from the ribosome inhibiting activity of tetracycline (45). Tetracycline also  
287 disturbed the localization of the cytoskeletal protein MreB and it is reasonable to assume  
288 that more membrane proteins will be affected, which would substantially impact the  
289 viability of cells. This additional activity of tetracycline also explains why the ribosomal  
290 *tet-4* mutation confers much lower levels of tetracycline resistance (MIC = 16 µg/ml) than  
291 the *tetL* resistance cassette that encodes for an efflux pump (MIC = 100 µg/ml). There is  
292 still a strong bias against membrane-targeting antibiotics, since they have a reputation to  
293 be unspecific and generally toxic. The fact that such an established antibiotic as tetracycline  
294 has been ‘secretly’ targeting the bacterial cell membrane for such a long time, underlines  
295 that the bacterial cell membrane can be successfully targeted without major side effects on  
296 human cells.

297           Membrane activity has never been shown for tetracycline before, but its  
298 analogue anhydrotetracycline has been suspected to target the cell membrane and to cause  
299 depolarization. This was based on the fact that anhydrotetracycline causes cell lysis in *E.*  
300 *coli* (46). Our data now show for the first time that anhydrotetracycline does indeed directly  
301 affect the cell membrane, however it does not kill by membrane depolarization. Our  
302 findings have significant implications for the use of anhydrotetracycline as inducer of gene  
303 expression, which is widely advertised to not have antibacterial activity (33). In fact, we

304 have shown that anhydrotetracycline has an even higher antibiotic activity than tetracycline  
305 (Supplementary Table 1).

306 Recently, it was shown that chelocardin, another member of the tetracycline group  
307 of antibiotics, inhibits translation but at higher concentrations also causes membrane stress  
308 (47). Anhydrotetracycline and chelocardin are often referred to as atypical tetracyclines,  
309 which are characterized by being bactericidal. The typical tetracyclines, such as  
310 oxytetracycline and tetracycline itself, are bacteriostatic and assumed to only target the  
311 ribosome (10). Our study now shows that both groups share membrane distortion as an  
312 overarching feature of their antibacterial activity.

313 How exactly tetracycline affects the cell membrane remains to be investigated. It  
314 has been proposed that due to their rather hydrophobic core structure, tetracyclines remain  
315 in the cytoplasmic membrane for a relatively long time before they translocate into the  
316 cytosol (10, 48). In fact, the clear membrane fluorescence signal observed with both  
317 tetracycline and anhydrotetracycline supports this hypothesis. It is reasonable to assume  
318 that the same chemical properties that retain these molecules in the membrane also promote  
319 bilayer distortion. Tetracycline is a large molecule with a bulky structure, which is likely  
320 to disturb the organization of the lipid bilayer. Anhydrotetracycline possesses a methyl  
321 group instead of the hydroxyl group, which stimulates interaction with the hydrocarbon  
322 core of the lipid bilayer (49). This may explain why anhydrotetracycline has a more severe  
323 effect on membrane organization.

324 From oxytetracycline, which was the first tetracycline to become commercially  
325 available in 1950, to doxycycline, which is one of the most commonly prescribed antibiotic  
326 drugs today, tetracyclines are widely used in human and veterinary medicine. Despite this

327 heavy use, target-based resistance mutations against tetracycline occur slowly, which has  
328 been attributed to the fact that ribosomes are encoded by multiple genes (50). However,  
329 resistance against other ribosome inhibitors like streptomycin is frequently observed (51).  
330 Therefore, an alternative explanation for the low resistance development against  
331 tetracyclines could be that they have a second target, the cell membrane, for which it is  
332 generally difficult to obtain suppressor mutations (52). Developing tetracyclines with  
333 enhanced membrane effects could be a desirable strategy to combat bacterial infections,  
334 since membrane-active bactericidal compounds are often also effective against persister  
335 cells, which are an increasing problem in the clinic (53–55). Finally, our results underscore  
336 the emerging realization that multi-target antibiotics are most successful in clinical use  
337 (50).

338

## 339 **Materials and Methods**

340

### 341 Antibiotics

342 Gramicidin, vancomycin, ampicillin, nitrofurantoin, tetracycline, anhydrotetracycline,  
343 kanamycin, and chloramphenicol were purchased from Sigma-Aldrich in the highest  
344 available purity. Daptomycin was purchased from Abcam. MP196 was synthesized by  
345 solid-phase synthesis as described previously (56). Gramicidin, nitrofurantoin,  
346 anhydrotetracycline, and MP196 were dissolved in sterile DMSO. Vancomycin,  
347 ampicillin, kanamycin, and daptomycin were dissolved in sterile water. Tetracycline and  
348 chloramphenicol were dissolved in ethanol.

349



350 Strain construction

351 Strains used in this study are listed in Supplementary Table 2. pAPNC-213-kan-based (57)  
352 plasmid pMW4 for integration of *sepF* into the *aprE* locus in the *B. subtilis* genome was  
353 constructed by Gibson assembly (58) using the primer pairs MW135 and MW139 for  
354 amplifying the pAPNC-213-kan vector backbone and MW140 and MW141 for amplifying  
355 the *sepF* gene. pMW4 was transformed into *B. subtilis* 168 using a standard starvation  
356 protocol (59). Deletion of the *sepF* gene was accomplished by transforming the resulting  
357 *B. subtilis* strain with chromosomal DNA isolated from YK204 (*sepF::spc*) (60). For  
358 construction of *B. subtilis* TNVS205 (*aprE::cat-Pspac-mcherry-mreB*) the *mreB* gene was  
359 amplified using the primer pair TerS397/TerS400 and the plasmid pAPNC213-cat (61) was  
360 amplified with the primer pairs TerS398/TerS337 and TerS338/135. The resulting PCR  
361 products were subjected to a three-fragment Gibson assembly reaction resulting in plasmid  
362 pTNV86. Transformation of pTNV86 into *B. subtilis* 168 resulted in TNVS205. See  
363 Supplementary Table 3 for primer sequences.

364

365 Minimal inhibitory concentration (MIC)

366 Minimal inhibitory concentrations were determined in a serial dilution assay as described  
367 in (62). Briefly, lysogeny broth (LB) was supplemented with different antibiotic  
368 concentrations and inoculated with  $5 \times 10^5$  CFU/ml of *B. subtilis* 168 (63). Cells were grown  
369 at 37 °C under steady agitation for 16 h. The lowest antibiotic concentration inhibiting  
370 visible bacterial growth was defined as MIC. The MIC of daptomycin was tested in  
371 presence of 1.25 mM CaCl<sub>2</sub>.

372

373 Growth experiments

374 *B. subtilis* 168 was aerobically grown in LB. Overnight cultures were diluted to an OD<sub>600</sub>  
375 of 0.05 and allowed to grow until an OD<sub>600</sub> of 0.4 prior to addition of antibiotics at different  
376 MIC multiples. Growth was monitored for 8 h using a Biotek Synergy MX plate reader.  
377 Concentrations leading to a reduced growth rate without causing massive cell lysis within  
378 the first 30 min of antibiotic exposure were chosen for electron microscopy. Daptomycin  
379 requires the presence of 1.25 mM CaCl<sub>2</sub>. Addition of CaCl<sub>2</sub> did not affect growth of *B.*  
380 *subtilis*.

381

382 Growth conditions for TEM experiments

383 *B. subtilis* 168 and *E. coli* MG1655 were grown in LB. *B. subtilis* MW17 was grown in the  
384 presence of 50 µg/ml spectinomycin and 0.5 mM IPTG overnight and diluted 1:100 into  
385 antibiotic-free medium containing 0.5 mM IPTG for the embedding experiment. *M. bovis*  
386 Bacillus Calmette Guérin (BCG) Tice (64) was grown in 7H9 medium (Difco)  
387 supplemented with Middlebrook albumin/dextrose/catalase supplement (BD Biosciences),  
388 and 0.05% Tween 80. When *M. bovis* BCG was to be observed without detergent treatment,  
389 cultures were washed and resuspended in fresh medium without Tween two days prior to  
390 the embedding procedure. *A. laidlawii* PG-8A was grown in modified PPLO medium  
391 (1.41% PPLO broth (BD Biosciences), 0.15% TC Yeastolate (Difco), 1.4% glucose, 20%  
392 horse serum, 1000 U/ml penicillin G (Sigma-Aldrich)). All cultures were maintained at 37°  
393 C under continuous shaking. After reaching mid-logarithmic growth phase, 50 µl of cells  
394 were withdrawn, pelleted by centrifugation (16,000x g, 2 min), and resuspended in 5 µl  
395 medium. For antibiotic treatment, *B. subtilis* 168 was aerobically grown in LB to an OD<sub>600</sub>

396 of 0.3 and subsequently treated with either 32 µg/ml valinomycin, 1 µg/ml vancomycin, 1  
397 µg/ml ampicillin, 16 µg/ml MP196, 0.5 µg/ml daptomycin, 32 µg/ml nitrofurantoin, 2  
398 µg/ml tetracycline, 2 µg/ml anhydrotetracycline, or left untreated as control. After 30 min  
399 of antibiotic treatment, 50-150 µl of sample were pelleted by centrifugation (16,000x g, 2  
400 min), and resuspended in 5-15 µl fresh LB. Higher cell densities resulted in less effective  
401 alignment of cells in the final sections.

402

#### 403 Flat embedding of bacteria on agarose

404 5-15 µl of the cell suspensions were spotted on 0.25 mm thick 1.5% agarose films  
405 (thickness was controlled using Gene Frame AB0576, ThermoFischer Scientific, see  
406 Supplementary Movie 1 for preparation). Excess liquid medium was allowed to evaporate  
407 under a slight air flow in a clean air bench. A 10 µl drop of sample created an area large  
408 enough to produce at least five individual blocks for sectioning. Volumes less than 5 µl  
409 still resulted in one or two blocks, making it well possible to work with initial culture  
410 volumes of less than 50 µl. For our antibiotic study we chose to spot 10 µl to have more  
411 material in case the antibiotic-treated cells would attach less efficiently to the agarose layer.  
412 For *M. tuberculosis*, which in general did not attach very well to agarose, we used 15 µl  
413 while for the other non-antibiotic treated bacterial samples 5 µl were sufficient. Spotting  
414 volumes higher than 15 µl, using higher concentrated samples, or multiple spotting on the  
415 same agarose patch did not further increase the number of longitudinally cut cells and in  
416 fact compromised their alignment. Agarose patches were transferred to aluminum dishes  
417 and kept free-floating (not sticking to the bottom of the dish to allow optimal diffusion of  
418 solutions into the agarose film) in the respective solutions with the cell samples facing

419 upwards during all fixation, washing, and dehydration steps. Mounted cells were fixed in  
420 5% glutaraldehyde (Merck) in 0.1 M cacodylate (Sigma-Aldrich) buffer (pH 7.4) for 20  
421 min. Samples were subsequently washed three times with 0.1 M cacodylate, pH 7.4 for 5  
422 min each, followed by incubation in 1% OsO<sub>4</sub> (EMS) / 1% KRu(III)(CN)<sub>6</sub> (Sigma Aldrich)  
423 for 30 min. Samples were then washed three times with ultrapure water for 5 min each.  
424 Dehydration was performed in an incubation series with rising ethanol (Merck)  
425 concentrations as follows: 5 min 30% ethanol, 5 min 50% ethanol, 2x 15 min 70% ethanol,  
426 1 h 80% ethanol, 15 min 90% ethanol, 15 min 96% ethanol, 15 min 100% ethanol, 30 min  
427 100% ethanol, water-free. Water-free ethanol was prepared by adding 2 ml acidulated 2,2-  
428 dimethoxypropan (two drops of 37% HCl ad 100 ml 2,2-dimethoxypropan (Sigma  
429 Aldrich)) to 100 ml ethanol absolute (Merck). Cells were then incubated for 30 min in a  
430 1:1 mixture of EPON and propylene oxide (EMS), followed by 30 min incubation in 2:1  
431 EPON / propylene oxide. All fixation, washing, and dehydration solutions were gently and  
432 slowly added starting from the side of the agarose patch in order not to wash off the spotted  
433 cells. Agarose patches were transferred to fresh aluminum dishes and covered with fresh  
434 EPON. Samples were left at room temperature overnight and then incubated at 65 °C for  
435 at least 36 h. EPON was prepared by mixing 48 g glycid ether (Serva) with 32 g  
436 dodecenylsuccinic anhydride (Serva) and 20 g methyl nadic anhydride (Serva).  
437 Components were mixed for 10 min prior to addition of four times 650 µl  
438 benzyldimethylamine (Serva) and mixed for an additional 15 min. EPON aliquots were  
439 kept at -20 °C until use. EPON solutions should not be kept for longer than 1 week prior  
440 to embedding to avoid infiltration artifacts. For flat embedding, it turned out that EPON  
441 prepared with glycid ether is superior to EPON prepared with EMbed (EMS), since the

442 latter results in less flexible EPON discs, which are more difficult to cut when selecting  
443 areas of interest for mounting.

444

#### 445 Classical pellet embedding

446 For pellet embedding, a 50 ml culture was harvested and the resulting pellet was fixed and  
447 dehydrated as above, with the only difference that cell pellets were incubated with the  
448 different fixation, washing, and dehydration solutions in glass vials under slow agitation.  
449 Fixed and dehydrated cell pellets were embedded in EPON using standard conical tip  
450 capsules.

451

#### 452 Flat embedding of bacteria on glass slides

453 Bacteria were grown and concentrated as described above. Concentrated cell suspensions  
454 (10  $\mu$ l) were spotted on glass cover slips that were coated with a thin carbon film as contrast  
455 agent to facilitate correct positioning of the EPON block during sectioning. Cells were  
456 mounted as described above and subsequently fixed in 5% glutaraldehyde / 0.1 M  
457 cacodylate (pH 7.4) for 20 min. Samples were washed three times with 0.1 M cacodylate  
458 (pH 7.4) for 5 min each, followed by incubation in 1% OsO<sub>4</sub> / 1% KRu(III)(CN)<sub>6</sub> for 30  
459 min. Since in this preparation procedure only the cells themselves and no agarose films  
460 need to be dehydrated, shorter dehydration times are possible. After washing the samples  
461 three times with ultrapure water (5 min each), dehydration was performed as follows: 5  
462 min 30% ethanol, 5 min 50% ethanol, 5 min 70% ethanol, 30 min 80% ethanol, 15 min  
463 90% ethanol, 15 min 96% ethanol, 5 min 100% ethanol, 15 min 100% ethanol, water-free,

464 30 min 50% EPON / 50% water-free ethanol. Slides were then transferred to fresh  
465 aluminum dishes and further prepared as described above.

466

#### 467 Sandwich embedding of *M. bovis* BCG

468 While *M. bovis* BCG aligned well on agarose, it was prone to subsequently being washed  
469 off the surface, which was effectively prevented by enclosing it in an agarose sandwich.  
470 To this end, 10  $\mu$ l of cells were spotted on an agarose patch as described above. After  
471 drying, the sample was covered with a second thin layer of 1.5% agarose. Low melting  
472 agarose did not give a stable and flat layer, making standard agarose superior for this  
473 method. In order not to induce a heat shock, the agarose solution was allowed to cool down  
474 to  $\sim$ 50  $^{\circ}$ C prior to applying it to the sample. The fresh agarose spot was immediately  
475 covered by a glass coverslip to produce a thin and flat surface. Immediately placing a small  
476 weight (e.g. a half-full 50 ml falcon tube face down) on top of the glass coverslip resulted  
477 in a thinner agarose layer, which greatly facilitates dehydration of the samples. After  
478 approximately 1 min the weight was removed and the coverslip was gently slid off the  
479 agarose, resulting in a flat and stable agarose sandwich (see Supplementary Movie 2 for  
480 preparation). The sandwich samples were further processed like normal agarose-embedded  
481 samples as described above.

482

#### 483 Electron microscopy

484 Regions of interest were selected by observing the EPON-embedded bacterial layer under  
485 a light microscope prior to mounting on EPON blocks for thin sectioning. Ultrathin  
486 sections ( $\sim$ 80 nm) were cut parallel to the bacterial layer, collected on single-slot, Formvar-

487 coated copper grids, and subsequently counterstained with uranyl acetate (Ultrastain I,  
488 Laurylab) and lead citrate (Reynolds) in a Leica EM AC20 ultrastainer. Bacteria were  
489 imaged using a JEOL 1010 transmission electron microscope at an electron voltage of 60  
490 kV using a side-mounted CCD camera (Modera, EMSIS).

491

#### 492 Further notes about flat embedding

493 Although flat embedding is straight forward, does not require any further technology or  
494 resources, and can be adapted in any laboratory equipped for TEM, two points have to be  
495 taken into consideration when applying this technique. Firstly, embedding on agarose  
496 requires careful dehydration, since residual water will lead to infiltration artifacts that either  
497 jeopardize ultrathin sectioning or, if sectioning is still possible, appear as strong  
498 background in the final sections. Insufficient dehydration might also lead to crooking of  
499 the agarose patch after overnight incubation with the EPON resin, defying the purpose of  
500 flat embedding. Therefore, dehydration steps should not be shortened and the agarose layer  
501 must be thin, especially for the sandwich approach. In this respect, flat embedding on  
502 carbon-coated glass surfaces is clearly at advantage, since in this case only the cells need  
503 to be dehydrated. Secondly, since all cells are aligned in one plane in both agarose and  
504 glass methods, ultrathin sectioning requires an experienced person in order to hit the resin  
505 block at perfectly perpendicular angle to the cells. While finding the right plane is easier  
506 in glass-embedded samples due to the carbon film, it also requires higher precision and  
507 care, since the almost perfect alignment of cells limits the tolerance for failed sectioning  
508 attempts.

509

510 Fluorescence light microscopy

511 All strains were aerobically grown in LB until an OD<sub>600</sub> of 0.4 prior to antibiotic treatment.  
512 For Nile red staining *B. subtilis* 168 was treated with 2 µg/ml tetracycline,  
513 anhydrotetracycline, 15 µg/ml chloramphenicol, or 3 µg/ml kanamycin for 30 min  
514 followed by membrane staining with 0.5 µg/ml Nile red for 1 min. For DAPI staining *B.*  
515 *subtilis* 168 was treated with 32 µg/ml nitrofurantoin for 5, 15, 30, or 60 min, respectively,  
516 followed by staining of the chromosome with 1 µg/ml DAPI for 1 min. *B. subtilis* LB318  
517 (168 *amyE::spc mgfp-minD aprE::cat mcherry-minC*) (37) was grown in the presence of  
518 0.1% xylose to induce expression of *mgfp-minD* and 0.1 mM IPTG to induce expression  
519 of *mcherry-minC*. TNVS205 (168 *aprE::cat mcherry-mreB*) was grown in the presence of  
520 0.3 mM IPTG to induce expression of *mcherry-mreB*. *B. subtilis* LB318 and TNVS205  
521 were treated with 2 µg/ml tetracycline, 2 µg/ml anhydrotetracycline, or 1 µg/ml gramicidin,  
522 respectively. Note that LB318 carries both a chloramphenicol and a kanamycin resistance  
523 cassette and TNVS205 carries only chloramphenicol resistance. Concentrations of  
524 chloramphenicol and kanamycin were 15 and 3 µg/ml, respectively, for non-resistant  
525 strains, and 20 and 10 µg/ml for strains carrying the respective resistance marker(s), which  
526 corresponds to double the selection concentration. Samples were observed under the  
527 microscope after 5 and 30 min of antibiotic treatment. Staining with DiSC(3)5 was carried  
528 out as described by te Winkel *et al.* (11) followed by treatment with 2 µg/ml tetracycline,  
529 2 µg/ml anhydrotetracycline, or 1 µg/ml gramicidin, respectively. Samples were examined  
530 after 5 and 30 min of antibiotic staining. DiIC12 staining was carried out as described in  
531 Müller *et al.* (40). All microscopy samples were spotted on a thin film of 1.2% agarose  
532 (11) and examined with a Nikon Eclipse Ti equipped with a CFI Plan Apochromat DM



533 100x oil objective, an Intensilight HG 130 W lamp, a C11440-22CU Hamamatsu ORCA  
534 camera, and NIS elements software. Images were analyzed using ImageJ (National  
535 Institutes of Health).

536

#### 537 Structured Illumination Microscopy (SIM)

538 Samples were prepared as for fluorescence light microscopy. Cover slips were coated with  
539 poly-dopamine to reduce background fluorescence by preventing binding of the membrane  
540 dye to the glass surface (11). Cells were imaged with a Nikon Eclipse Ti N-SIM E  
541 microscope setup equipped with a CFI SR Apochromat TIRF 100x oil objective (NA1.49),  
542 a LU-N3-SIM laser unit, an Orca-Flash 4.0 sCMOS camera (Hamamatsu Photonics K.K.),  
543 and NIS elements Ar software. Images were analyzed using ImageJ (National Institutes of  
544 Health).

545

#### 546 Spectroscopic membrane potential measurements

547 Cells were cultured as for microscopy experiments and transferred to a pre-warmed 96-  
548 well plate after reaching an OD<sub>600</sub> of 0.4. DiSC(3)5 measurements were carried out as  
549 described by te Winkel *et al.* (11). Cells were treated with 2 µg/ml tetracycline, 2 µg/ml  
550 anhydrotetracycline, and 1 µg/ml gramicidin and measurements were taken every 30 sec  
551 over a total of 30 min. Kanamycin (3 µg/ml) and chloramphenicol (15 µg/ml) were also  
552 tested but had no effect on the membrane potential (data not shown). All antibiotics were  
553 tested for an effect on DiSC(3)5 fluorescence in solution to control for interference with  
554 the dye but no change in DiSC(3)5 fluorescence was observed (data not shown).

555

556 **Acknowledgments**

557

558 We would like to thank Bruce Koppen for assistance with MIC and growth experiments,  
559 Tjalling Siersma for assistance with DiSC(3)5 measurements, Laura Bohorquez for  
560 constructing LB318, and Terrens Saaki for constructing TNVS205. MP196 was kindly  
561 supplied by Nils Metzler-Nolte, Ruhr University Bochum. This work was financially  
562 supported by the Netherlands Organization for Scientific Research (NWO,  
563 <http://nwo.nl/en>, STW-Vici 12128 to LWH). MW was supported by a postdoc stipend from  
564 the Amsterdam Infection and Immunity Institute. BW was supported by a PhD fellowship  
565 of the China Scholarship Council. Electron microscopy was performed at the VU/VUMC  
566 EM facility, supported by the Netherlands Organization for Scientific Research (NWO,  
567 middelgroot 91111009).

568

569 **References**

570

571

- 572 1. K. Santhana Raj, L; Hing, HL; Baharudin, O; Aida Suhana, R; Nor Asiha, CP;  
573 Paramsarvaran, S; Sumarni, G; Hanjeet, Rapid method for transmission electron  
574 microscopy study of Staphylococcus aureus ATCC 25923. *Ann. Microsc.* **7**, 102–  
575 108 (2007).
- 576 2. E. C. Spindler, J. D. F. Hale, T. H. J. Giddings, R. E. W. Hancock, R. T. Gill,  
577 Deciphering the mode of action of the synthetic antimicrobial peptide Bac8c.  
578 *Antimicrob. Agents Chemother.* **55**, 1706–1716 (2011).

- 579 3. V. R. F. Matias, T. J. Beveridge, Cryo-electron microscopy reveals native polymeric  
580 cell wall structure in *Bacillus subtilis* 168 and the existence of a periplasmic space.  
581 *Mol. Microbiol.* **56**, 240–251 (2005).
- 582 4. L. Delgado, G. Martínez, C. López-Iglesias, E. Mercadé, Cryo-electron tomography  
583 of plunge-frozen whole bacteria and vitreous sections to analyze the recently  
584 described bacterial cytoplasmic structure, the Stack. *J. Struct. Biol.* **189**, 220–229  
585 (2015).
- 586 5. M. Pilhofer, M. S. Ladinsky, A. W. McDowall, G. J. Jensen, Bacterial TEM: new  
587 insights from cryo-microscopy. *Methods Cell Biol.* **96**, 21–45 (2010).
- 588 6. M. Wenzel, *et al.*, Small cationic antimicrobial peptides delocalize peripheral  
589 membrane proteins. *Proc. Natl. Acad. Sci. U. S. A.* **111**, E1409-18 (2014).
- 590 7. G. B. Chapman, ELECTRON MICROSCOPY OF ULTRATHIN SECTIONS OF  
591 BACTERIA III. : Cell Wall, Cytoplasmic Membrane, and Nuclear Material. *J.*  
592 *Bacteriol.* **78**, 96–104 (1959).
- 593 8. N. Panova, *et al.*, Insights into the Mechanism of Action of Bactericidal  
594 Lipophosphonoxins. *PLoS One* **10**, e0145918 (2015).
- 595 9. M. Hartmann, *et al.*, Damage of the bacterial cell envelope by antimicrobial peptides  
596 gramicidin S and PGLa as revealed by transmission and scanning electron  
597 microscopy. *Antimicrob. Agents Chemother.* **54**, 3132–3142 (2010).
- 598 10. I. Chopra, M. Roberts, Tetracycline antibiotics: mode of action, applications,  
599 molecular biology, and epidemiology of bacterial resistance. *Microbiol. Mol. Biol.*  
600 *Rev.* **65**, 232–60 ; second page, table of contents (2001).
- 601 11. J. D. te Winkel, D. A. Gray, K. H. Seistrup, L. W. Hamoen, H. Strahl, Analysis of

- 602 antimicrobial-triggered membrane depolarisation using voltage sensitive dyes.  
603 *Front. Cell Dev. Biol.* **4**, 29 (2016).
- 604 12. M. Wenzel, N. O. E. Vischer, H. Strahl, L. W. Hamoen, Assessing Membrane  
605 Fluidity and Visualizing Fluid Membrane Domains in Bacteria Using Fluorescent  
606 Membrane Dyes. *Bio-protocol* **8**, e3063 (2018).
- 607 13. S. Masaki, G. Sugimori, A. Okamoto, J. Imose, Y. Hayashi, Effect of Tween 80 on  
608 the growth of Mycobacterium avium complex. *Microbiol. Immunol.* **34**, 653–663  
609 (1990).
- 610 14. WHO, *Mycobacterium Tuberculosis Protocols*, T. Parish, N. G. Stoker, Eds., 1st  
611 Ed. (Humana Press, 2001).
- 612 15. R. Prados-Rosales, *et al.*, The Type of Growth Medium Affects the Presence of a  
613 Mycobacterial Capsule and Is Associated With Differences in Protective Efficacy  
614 of BCG Vaccination Against Mycobacterium tuberculosis. *J. Infect. Dis.* **214**, 426–  
615 437 (2016).
- 616 16. E. L. Wright, M. Pourshafie, W. W. Barrow, Mycobacterium avium rough-to-  
617 smooth colony conversion resulting from growth in Tween 80 without presence of  
618 type-specific glycopeptidolipid antigens. *FEMS Microbiol. Lett.* **77**, 209–216  
619 (1992).
- 620 17. M. Sani, *et al.*, Direct visualization by cryo-EM of the mycobacterial capsular layer:  
621 a labile structure containing ESX-1-secreted proteins. *PLoS Pathog.* **6**, e1000794  
622 (2010).
- 623 18. A. Glatman-Freedman, *et al.*, Antigenic evidence of prevalence and diversity of  
624 Mycobacterium tuberculosis arabinomannan. *J. Clin. Microbiol.* **42**, 3225–3231

- 625 (2004).
- 626 19. J. R. Schwebach, *et al.*, Expression of a Mycobacterium tuberculosis arabinomannan  
627 antigen in vitro and in vivo. *Infect. Immun.* **69**, 5671–5678 (2001).
- 628 20. J. R. Schwebach, *et al.*, Glucan is a component of the Mycobacterium tuberculosis  
629 surface that is expressed in vitro and in vivo. *Infect. Immun.* **70**, 2566–2575 (2002).
- 630 21. T. Schneider, H. G. Sahl, An oldie but a goodie - cell wall biosynthesis as antibiotic  
631 target pathway. *Int. J. Med. Microbiol.* **300**, 161–169 (2010).
- 632 22. K. Tiyanont, *et al.*, Imaging peptidoglycan biosynthesis in *Bacillus subtilis* with  
633 fluorescent antibiotics. *Proc. Natl. Acad. Sci. U. S. A.* **103**, 11033–11038 (2006).
- 634 23. Y. Tu, D. R. McCalla, Effect of activated nitrofurans on DNA. *Biochim. Biophys.*  
635 *Acta* **402**, 142–149 (1975).
- 636 24. E. Cabiscol, J. Tamarit, J. Ros, Oxidative stress in bacteria and protein damage by  
637 reactive oxygen species. *Int. Microbiol.* **3**, 3–8 (2000).
- 638 25. S. J. Yoon, J. E. Park, J.-H. Yang, J.-W. Park, OxyR regulon controls lipid  
639 peroxidation-mediated oxidative stress in *Escherichia coli*. *J. Biochem. Mol. Biol.*  
640 **35**, 297–301 (2002).
- 641 26. H.-S. Lee, *et al.*, Mechanism of Regulation of 8-Hydroxyguanine Endonuclease by  
642 Oxidative Stress: Roles of FNR, ArcA, and Fur. *Free Radic. Biol. Med.* **24**, 1193–  
643 1201 (1998).
- 644 27. D. Schnappinger, W. Hillen, Tetracyclines: antibiotic action, uptake, and resistance  
645 mechanisms. *Arch. Microbiol.* **165**, 359–369 (1996).
- 646 28. D. Saeloh, *et al.*, The novel antibiotic rhodomyrton traps membrane proteins in  
647 vesicles with increased fluidity. *PLoS Pathog.* **14**, e1006876 (2018).

- 648 29. M. Wenzel, *et al.*, The multifaceted antibacterial mechanisms of the pioneering  
649 peptide antibiotics tyrocidine and gramicidin S. *MBio* **9**, e00802-18 (2018).
- 650 30. N. Jahn, S. Brantl, H. Strahl, Against the mainstream: the membrane-associated type  
651 I toxin BsrG from *Bacillus subtilis* interferes with cell envelope biosynthesis without  
652 increasing membrane permeability. *Mol. Microbiol.* **98**, 651–666 (2015).
- 653 31. T. Lederer, *et al.*, Tetracycline analogs affecting binding to Tn10-Encoded Tet  
654 repressor trigger the same mechanism of induction. *Biochemistry* **35**, 7439–7446  
655 (1996).
- 656 32. B. Rasmussen, *et al.*, Molecular basis of tetracycline action: identification of analogs  
657 whose primary target is not the bacterial ribosome. *Antimicrob. Agents Chemother.*  
658 **35**, 2306–2311 (1991).
- 659 33. R. Lutz, H. Bujard, Independent and tight regulation of transcriptional units in  
660 *Escherichia coli* via the LacR/O, the TetR/O and AraC/I1-I2 regulatory elements.  
661 *Nucleic Acids Res.* **25**, 1203–1210 (1997).
- 662 34. H. Strahl, L. W. Hamoen, Membrane potential is important for bacterial cell  
663 division. *Proc. Natl. Acad. Sci. U. S. A.* **107**, 12281–12286 (2010).
- 664 35. K. Scheinpflug, *et al.*, Antimicrobial peptide cWFW kills by combining lipid phase  
665 separation with autolysis. *Sci. Rep.* **7**, 44332 (2017).
- 666 36. V. W. Rowlett, W. Margolin, The bacterial Min system. *Curr. Biol.* **23**, R553–R556  
667 (2013).
- 668 37. L. C. Bohorquez Suarez, “The Dynamic Role of the Conserved WhiA and MinD  
669 Proteins in Chromosome Segregation, Fatty Acid Metabolism and Cell Division in  
670 *Bacillus subtilis*,” University of Amsterdam. (2018).

- 671 38. H. Strahl, F. Burmann, L. W. Hamoen, The actin homologue MreB organizes the  
672 bacterial cell membrane. *Nat. Commun.* **5**, 3442 (2014).
- 673 39. D. Lopez, R. Kolter, Functional microdomains in bacterial membranes. *Genes Dev.*  
674 **24**, 1893–1902 (2010).
- 675 40. A. Mueller, *et al.*, Daptomycin inhibits bacterial cell envelope synthesis by  
676 interfering with fluid membrane microdomains. *Proc. Natl. Acad. Sci. U. S. A.* **113**,  
677 E7077-7086 (2016).
- 678 41. H. T. McMahon, J. L. Gallop, Membrane curvature and mechanisms of dynamic  
679 cell membrane remodelling. *Nature* **438**, 590–596 (2005).
- 680 42. G. Williams, I. Smith, Chromosomal mutations causing resistance to tetracycline in  
681 *Bacillus subtilis*. *Mol. Gen. Genet.* **177**, 23–29 (1979).
- 682 43. Y. Wei, D. H. Bechhofer, Tetracycline induces stabilization of mRNA in *Bacillus*  
683 *subtilis*. *J. Bacteriol.* **184**, 889–894 (2002).
- 684 44. T. A. Krulwich, J. Jin, A. A. Guffanti, H. Bechhofer, Functions of tetracycline efflux  
685 proteins that do not involve tetracycline. *J. Mol. Microbiol. Biotechnol.* **3**, 237–246  
686 (2001).
- 687 45. P. Gamba, E. Rietkotter, R. A. Daniel, L. W. Hamoen, Tetracycline hypersensitivity  
688 of an *ezaA* mutant links GalE and TseB (YpmB) to cell division. *Front. Microbiol.*  
689 **6**, 346 (2015).
- 690 46. B. Oliva, G. Gordon, P. McNicholas, G. Ellestad, I. Chopra, Evidence that  
691 tetracycline analogs whose primary target is not the bacterial ribosome cause lysis  
692 of *Escherichia coli*. *Antimicrob. Agents Chemother.* **36**, 913–919 (1992).
- 693 47. J. J. Stepanek, T. Lukezic, I. Teichert, H. Petkovic, J. E. Bandow, Dual mechanism

- 694 of action of the atypical tetracycline chelocardin. *Biochim. Biophys. Acta* **1864**, 645–  
695 654 (2016).
- 696 48. I. Chopra, Tetracycline analogs whose primary target is not the bacterial ribosome.  
697 *Antimicrob. Agents Chemother.* **38**, 637–640 (1994).
- 698 49. J. J. Stezowski, Chemical-structural properties of tetracycline derivatives. 1.  
699 Molecular structure and conformation of the free base derivatives. *J. Am. Chem. Soc.*  
700 **98**, 6012–6018 (1976).
- 701 50. H. Brötz-Oesterhelt, N. a. Brunner, How many modes of action should an antibiotic  
702 have? *Curr. Opin. Pharmacol.* **8**, 564–573 (2008).
- 703 51. B. Springer, *et al.*, Mechanisms of Streptomycin Resistance: Selection of Mutations  
704 in the 16S rRNA Gene Conferring Resistance. *Antimicrob. Agents Chemother.* **45**,  
705 2877 LP – 2884 (2001).
- 706 52. M. R. Yeaman, N. Y. Yount, Mechanisms of antimicrobial peptide action and  
707 resistance. *Pharmacol. Rev.* **55**, 27–55 (2003).
- 708 53. M. Berditsch, H. Lux, O. Babii, S. Afonin, A. S. Ulrich, Therapeutic Potential of  
709 Gramicidin S in the Treatment of Root Canal Infections. *Pharmaceuticals (Basel)*.  
710 **9** (2016).
- 711 54. K. Lewis, Persister cells: molecular mechanisms related to antibiotic tolerance.  
712 *Handb. Exp. Pharmacol.*, 121–133 (2012).
- 713 55. J. G. Hurdle, A. J. O’Neill, I. Chopra, R. E. Lee, Targeting bacterial membrane  
714 function: an underexploited mechanism for treating persistent infections. *Nat. Rev.*  
715 *Microbiol.* **9**, 62–75 (2011).
- 716 56. H. B. Albada, *et al.*, Modulating the activity of short arginine-tryptophan containing



- 717           antibacterial peptides with N-terminal metallocenoyl groups. *Beilstein J. Org.*  
718           *Chem.* **8**, 1753–1764 (2012).
- 719 57. M. Yoshimura, T. Oshima, N. Ogasawara, Involvement of the YneS/YgiH and PlsX  
720 proteins in phospholipid biosynthesis in both *Bacillus subtilis* and *Escherichia coli*.  
721 *BMC Microbiol.* **7**, 69 (2007).
- 722 58. D. G. Gibson, *et al.*, Enzymatic assembly of DNA molecules up to several hundred  
723 kilobases. *Nat Meth* **6**, 343–345 (2009).
- 724 59. P. M. Hauser, D. Karamata, A rapid and simple method for *Bacillus subtilis*  
725 transformation on solid media. *Microbiology* **140**, 1613–1617 (1994).
- 726 60. S. Ishikawa, Y. Kawai, K. Hiramatsu, M. Kuwano, N. Ogasawara, A new FtsZ-  
727 interacting protein, YlmF, complements the activity of FtsA during progression of  
728 cell division in *Bacillus subtilis*. *Mol. Microbiol.* **60**, 1364–1380 (2006).
- 729 61. H. Strahl, *et al.*, Transmembrane protein sorting driven by membrane curvature. *Nat.*  
730 *Commun.* **6**, 8728 (2015).
- 731 62. M. Wenzel, *et al.*, Towards Profiles of Resistance Development and Toxicity for the  
732 Small Cationic Hexapeptide RWRWRW-NH Towards Profiles of Resistance  
733 Development and Toxicity for the Small Cationic Hexapeptide RWRWRW-NH 2.  
734 *Front. Cell Dev. Biol. Cell Dev. Biol* **4** (2016).
- 735 63. C. Anagnostopoulos, J. Spizizen, Requirements for transformation in *Bacillus*  
736 *subtilis*. *J. Bacteriol.* **81**, 741–746 (1960).
- 737 64. A. M. Abdallah, *et al.*, Genomic expression catalogue of a global collection of BCG  
738 vaccine strains show evidence for highly diverged metabolic and cell-wall  
739 adaptations. *Sci. Rep.* **5**, 15443 (2015).

- 740 65. K. F. Jensen, The Escherichia coli K-12 “wild types” W3110 and MG1655 have an  
741 rph frameshift mutation that leads to pyrimidine starvation due to low pyrE  
742 expression levels. *J. Bacteriol.* **175**, 3401–3407 (1993).
- 743 66. V. N. Lazarev, *et al.*, Complete genome and proteome of *Acholeplasma laidlawii*.  
744 *J. Bacteriol.* **193**, 4943–4953 (2011).
- 745 67. Y. Gao, M. Wenzel, M. J. Jonker, L. W. Hamoen, Free SepF interferes with  
746 recruitment of late cell division proteins. *Sci. Rep.* **7**, 16928 (2017).
- 747 68. T. Schneider, *et al.*, Plectasin, a fungal defensin, targets the bacterial cell wall  
748 precursor Lipid II. *Science* **328**, 1168–1172 (2010).
- 749 69. J. Pogliano, N. Pogliano, J. A. Silverman, Daptomycin-mediated reorganization of  
750 membrane architecture causes mislocalization of essential cell division proteins. *J.*  
751 *Bacteriol.* **194**, 4494–4504 (2012).
- 752

753 **Figures and Tables**

754

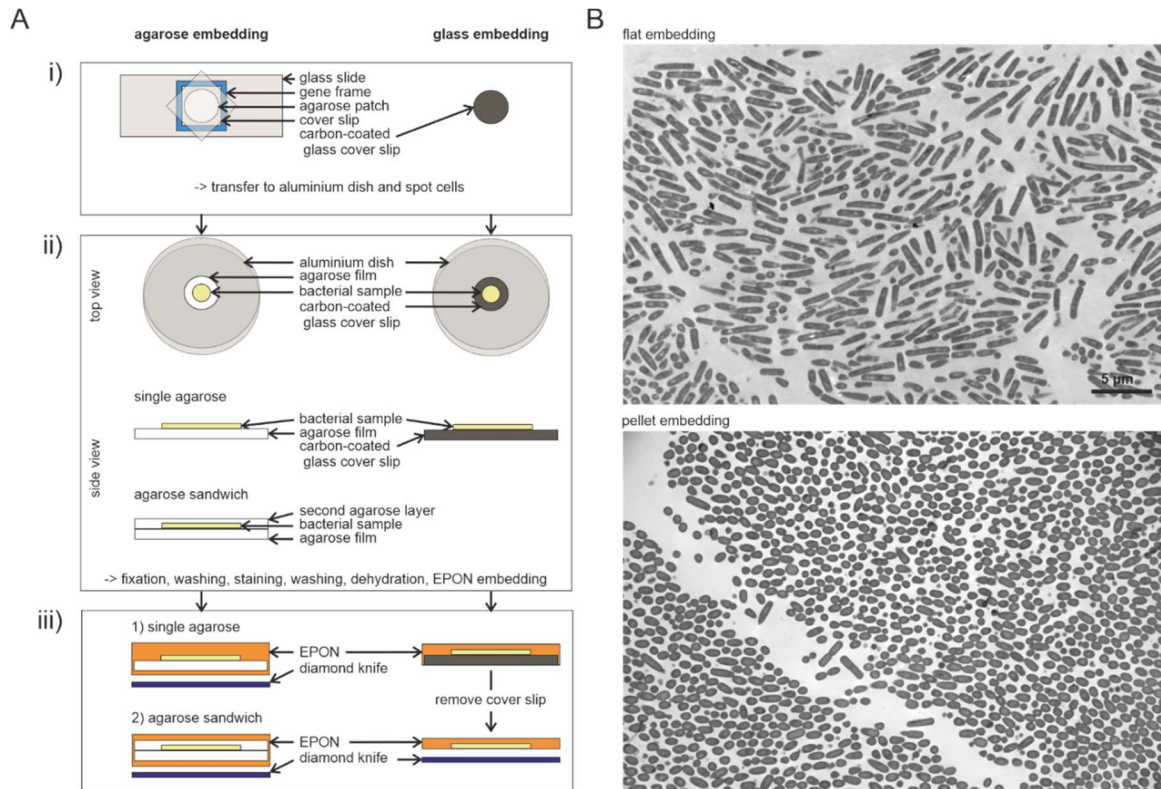

755

756

757 **Figure 1:** The flat embedding technique. (A) Schematic representation of the flat  
758 embedding work flow including embedding on a single layer of agarose, embedding in an  
759 agarose sandwich (for mycobacteria), and embedding on carbon-coated glass coverslips.  
760 (i) Preparation of the surface. Uniform thickness of the agarose film is ensured by using a  
761 gene frame as spacer. (ii) The agarose or glass surface is transferred to an aluminum dish  
762 and a small drop of cell sample is spotted on top of the surface and allowed to dry under a  
763 slight air flow. For the agarose sandwich approach, a second flat layer of agarose is added  
764 on top of the cells without using a gene frame. (iii) Samples after EPON embedding. For  
765 glass embedding, the glass cover slip is broken off the EPON disc prior to sectioning. (B)

766 Overview pictures of *B. subtilis* 168 cells embedded on a single agarose layer (top) and as  
767 pellet (bottom) at 5000x magnification.

768

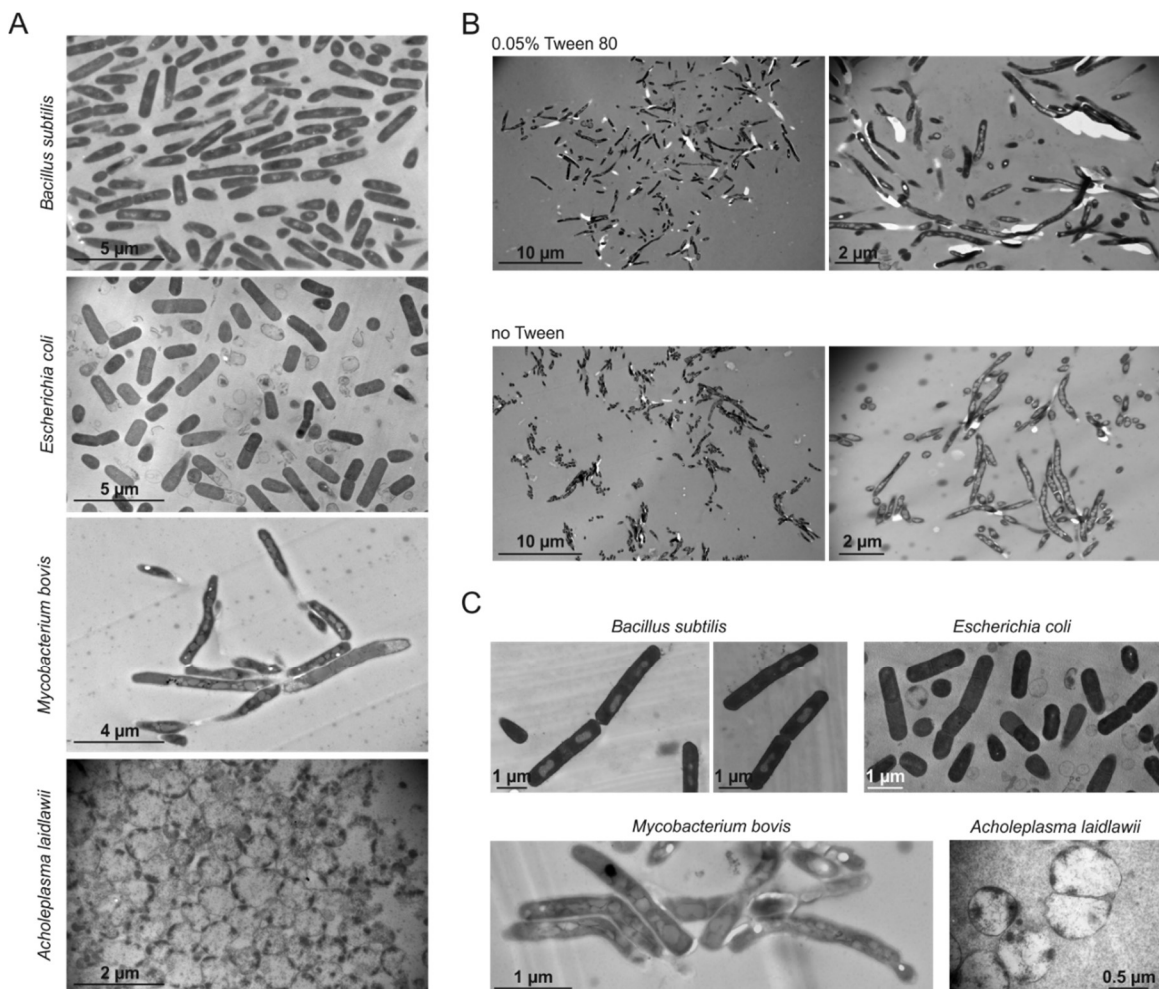

769

770

771 **Figure 2:** Transmission electron micrographs of flat-embedded *Bacillus subtilis*,

772 *Escherichia coli*, *Mycobacterium bovis* BCG, and *Acholeplasma laidlawii*. (A) Bacteria

773 embedded on a single layer of agarose. (B) Agarose sandwich approach to flat embedding

774 of mycobacteria. *M. bovis* BCG was grown in the presence or absence of 0.05% Tween 80.

775 (C) Bacteria embedded on carbon-coated coverslips.

776

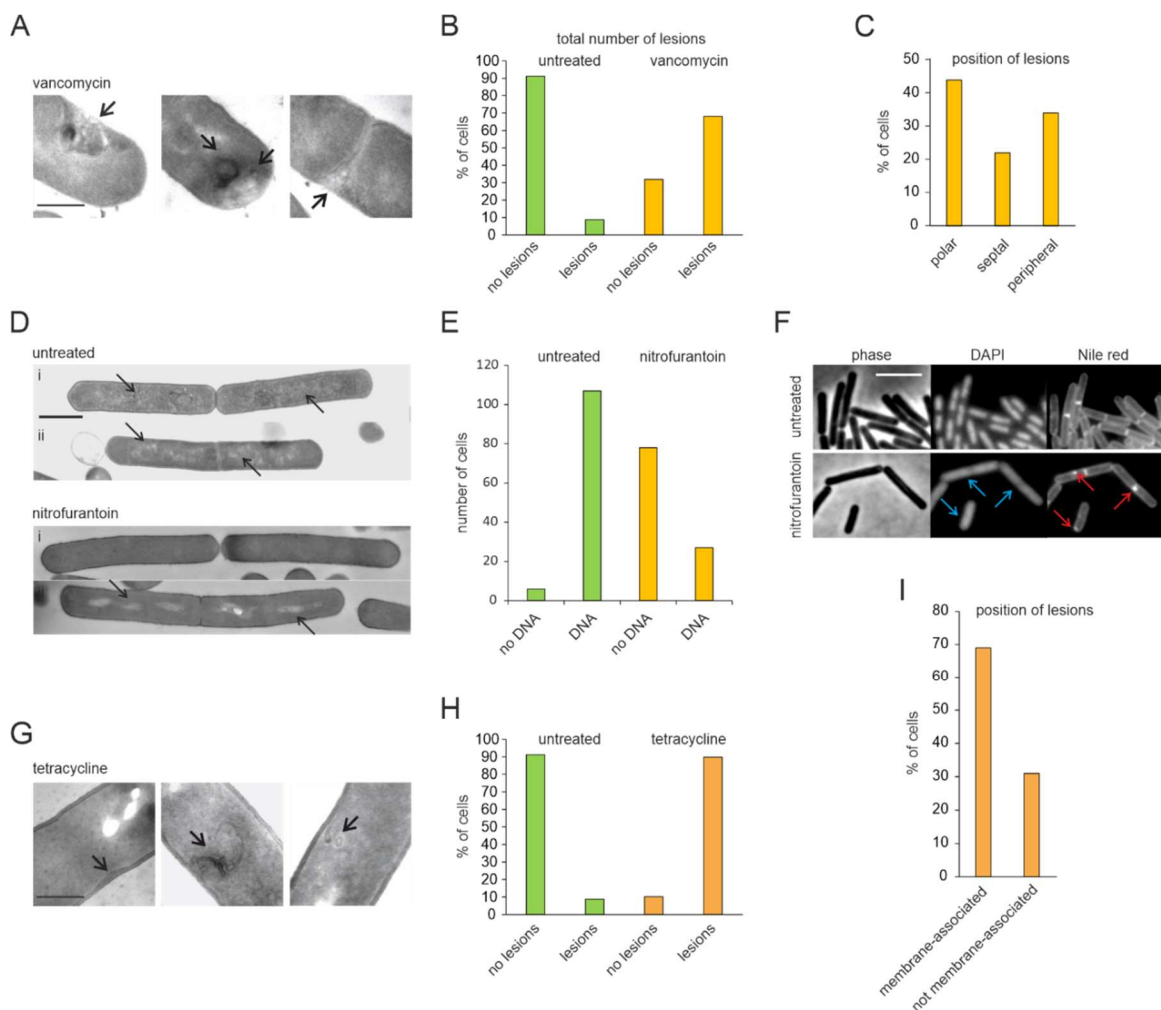

777

778

779 **Figure 3:** Quantification of antibiotic-induced lesions based on electron micrographs.

780 Cells were quantified from electron micrographs at 8000 to 15000x magnification. A

781 minimum of 100 cells was examined per condition. (A) TEM images showing cell wall

782 damage caused by vancomycin, which occurred either at the periphery (left panel), the

783 poles (middle panel), or the septum (right panel). (B) Quantification of the total number of

784 lesions caused by vancomycin. (C) Position of cell wall lesions in vancomycin-treated

785 cells. (D) TEM images showing deterioration of nucleoids caused by nitrofurantoin.

786 Electron micrographs show two different examples of untreated control cells (upper panels;

787 i and ii: healthy control cells with visible nucleoids) and nitrofurantoin-treated cells (lower  
788 panels; i: cell without DNA, ii: cell with deteriorated nucleoid). Arrows indicate nucleoid  
789 structures. Scale bar 1  $\mu\text{m}$ . (E) Quantification of cells devoid of visible nucleoids in  
790 electron micrographs. Note that all nitrofurantoin-treated cells with visible DNA structures  
791 displayed a deteriorated nucleoid as shown in A (lower panel ii). (F) Fluorescence light  
792 microscopy images of *B. subtilis* stained with the DNA dye DAPI and the membrane dye  
793 Nile red. Blue arrows indicate diffuse DNA stain. Red arrows indicate membrane patches.  
794 Cells were treated with 4x MIC of nitrofurantoin for 30 min. Scale bar 3  $\mu\text{m}$ . (G) TEM  
795 images showing lesions caused by tetracycline that are either clearly membrane-associated  
796 (left and middle panels) or not visibly membrane-associated (right panel). Scale bar 500  
797 nm. (H) Quantification of total lesions in cells treated with tetracycline. (I) Quantification  
798 of different types of membrane lesions caused by tetracycline.  
799



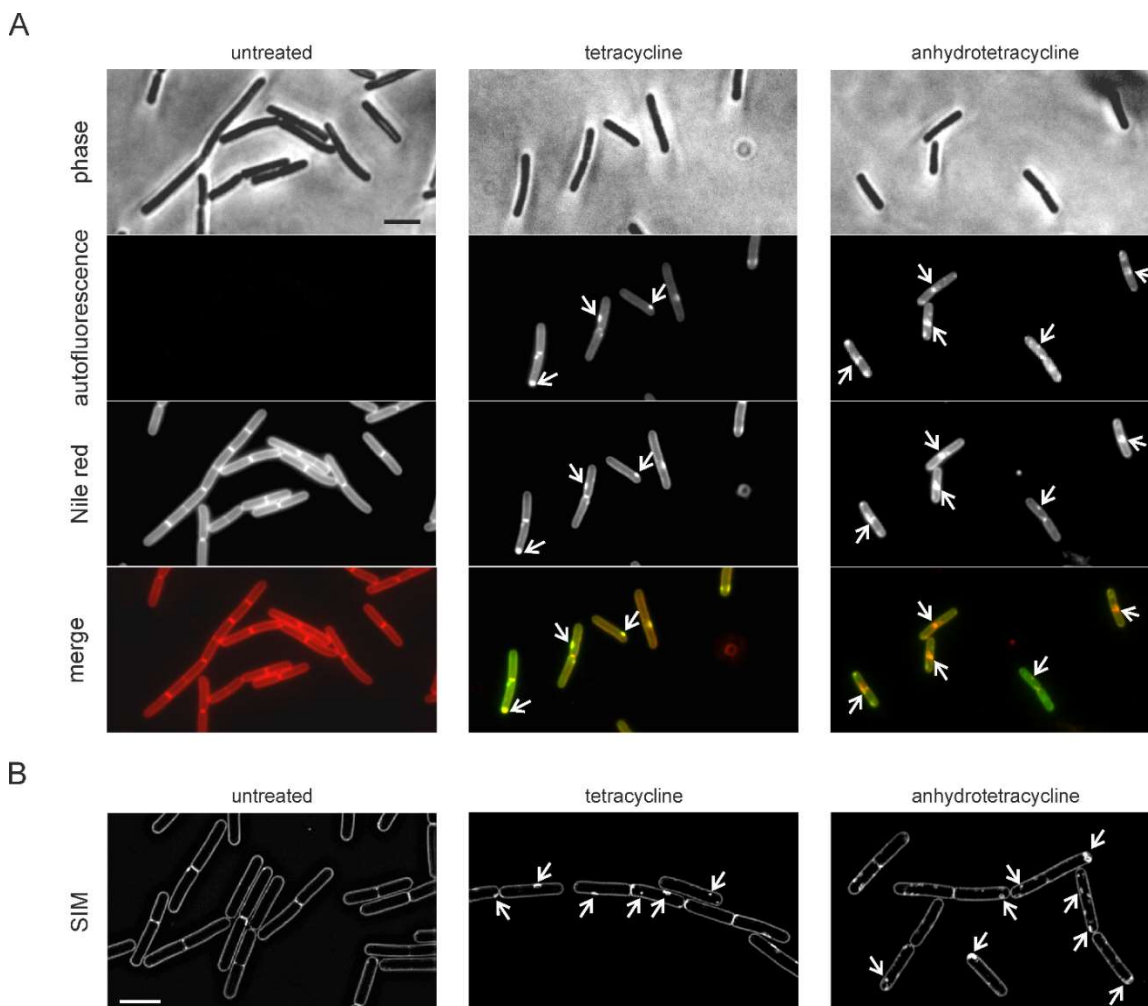

800

801

802 **Figure 4:** Tetracycline targets the cytoplasmic membrane. (A) Fluorescence microscopy  
803 images of cells treated with either tetracycline or anhydrotetracycline for 30 min. Both  
804 compounds display green autofluorescence allowing direct localization of the compound.  
805 Cell membranes were stained with Nile red. Arrows indicate fluorescent membrane patches  
806 coinciding with accumulation of the respective antibiotic. See Supplementary Figure 6 for  
807 quantification. (B) SIM microscopy images of cells treated with either tetracycline or



808 anhydrotetracycline for 30 min. Membranes were stained with Nile red. Arrows indicate

809 membrane staples or invaginations. Scale bars 2  $\mu\text{m}$ .

810

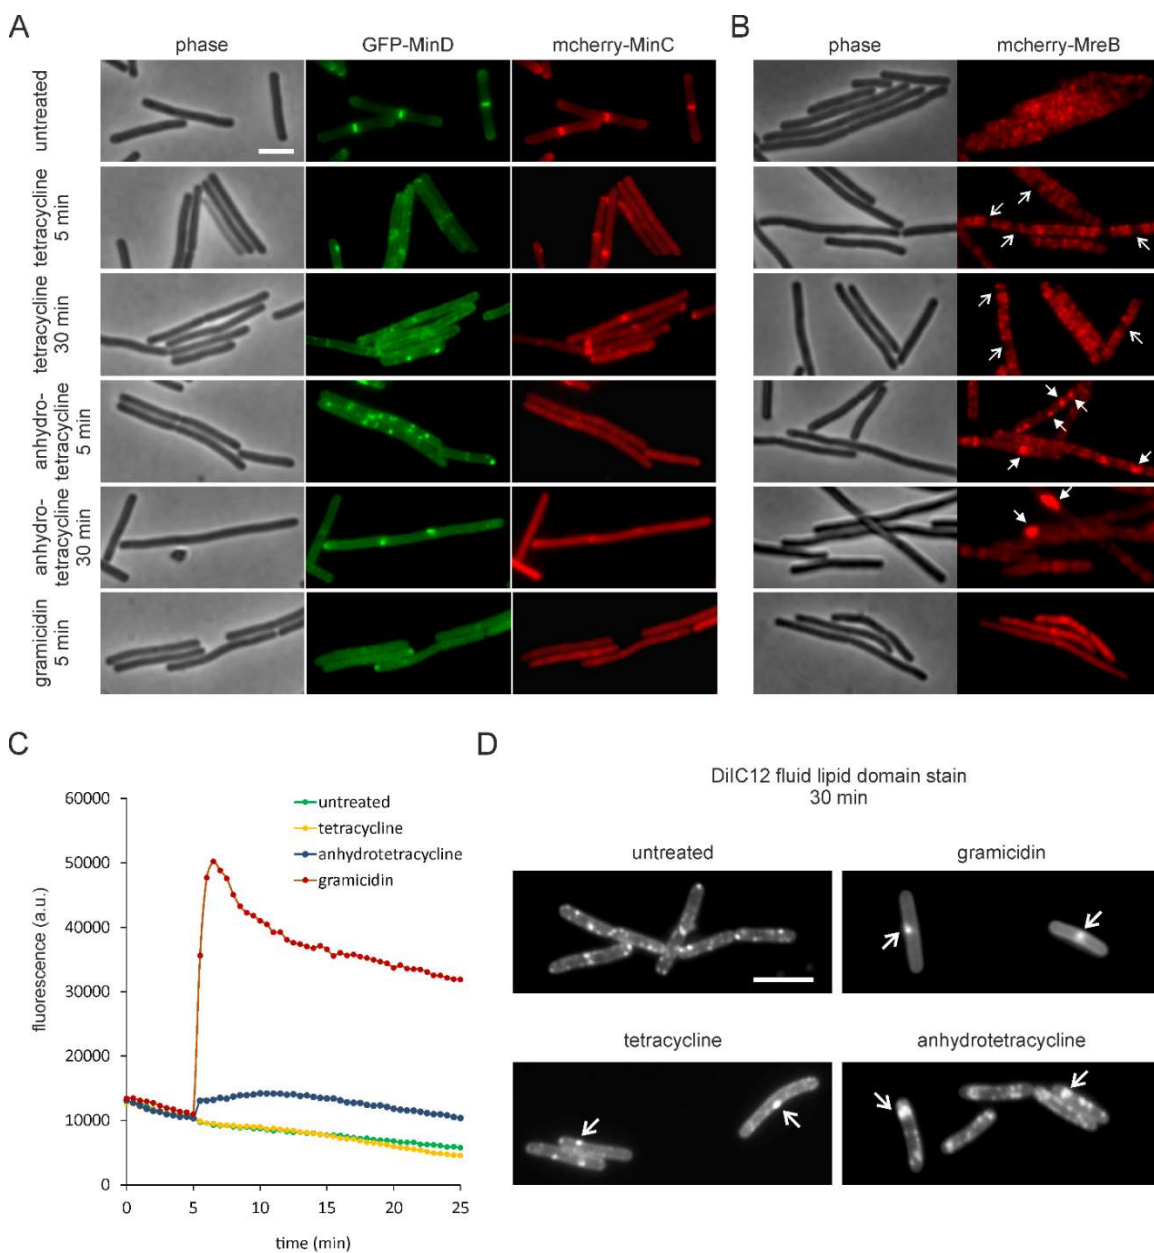

811

812

813 **Figure 5:** Tetracyclines delocalize membrane proteins. Effects of tetracycline (2  $\mu\text{g/ml}$ ),

814 anhydrotetracycline (2  $\mu\text{g/ml}$ ), and gramicidin (1  $\mu\text{g/ml}$ , positive control) on *B. subtilis*

815 LB318 (168 *amyE::spc mgfp-minD aprE::cat mcherry-minC*) (A) and TNVS205 (168

816 *aprE::cat mcherry-mreB*) (B). (C) Effects of tetracycline (2  $\mu\text{g/ml}$ ), anhydrotetracycline

817 (2  $\mu\text{g/ml}$ ), and gramicidin (1  $\mu\text{g/ml}$ , positive control) on the membrane potential of *B.*  
818 *subtilis* 168 measured with DiSC(3)5. An exemplary graph out of three biological  
819 replicates is shown. (D) Effects of tetracycline (2  $\mu\text{g/ml}$ ), anhydrotetracycline (2  $\mu\text{g/ml}$ ),  
820 and gramicidin (1  $\mu\text{g/ml}$ , positive control) on fluid membrane microdomains of *B. subtilis*  
821 168 cells stained with the fluid lipid domain dye DiIC12. Scale bars 2  $\mu\text{m}$ .  
822

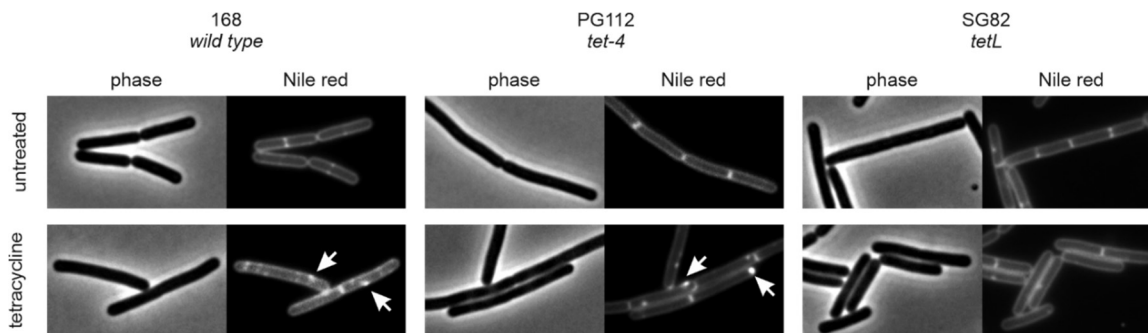

823

824

825 **Figure 6:** Tetracycline affects the membrane independently of ribosome inhibition. Strain

826 PG112 carries the *tet-4* mutation, a point mutation in the ribosomal protein S10 that renders

827 ribosomes insensitive to tetracycline. Strain SG82 carries the *tetL* tetracycline efflux pump.

828 Cells were treated with 1x MIC of tetracycline (16  $\mu\text{g/ml}$  for PG112, 100  $\mu\text{g/ml}$  for SG82)

829 for 30 min prior to membrane staining with Nile red and microscopy. Scale bar 2  $\mu\text{m}$ .

830

831 **Supplementary Information**

832

833 **New flat embedding method for transmission electron microscopy reveals an**  
834 **unknown mechanism of tetracycline**

835

836 Michaela Wenzel, Marien P. Dekker, Biwen Wang, Maroeska J. Burggraaf, Wilbert Bitter,  
837 Jan R. T. van Weering, Leendert W. Hamoen

838

839 **Supplementary Table 1:** Minimal inhibitory concentrations of antimicrobial compounds  
840 against *B. subtilis* 168.

841 **Supplementary Table 2:** Bacterial strains used in this study.

842 **Supplementary Table 3:** Primer sequences.

843

844 **Supplementary Figure 1:** Example of a polymerized EPON disc after flat embedding.

845 **Supplementary Figure 2:** Flat embedding of filamentous cells.

846 **Supplementary Figure 3:** Growth of *B. subtilis* 168 after treatment with different  
847 antibiotic concentrations.

848 **Supplementary Figure 4:** Electron micrographs **(A)** and detail images **(B)** of *B. subtilis*  
849 cells treated with different antibiotics for 20 min.

850 **Supplementary Figure 5:** Effects of 5 min treatment with nitrofurantoin on the nucleoid.

851 **Supplementary Figure 6:** Quantification of fluorescence microscopy images.

852 **Supplementary Figure 7:** Localization of tetracycline and anhydrotetracycline in *B.*  
853 *subtilis* 168.

- 854 **Supplementary Figure 8:** Exemplary lesions caused by anhydrotetracycline.
- 855 **Supplementary Figure 9:** DiSC(3)5 staining of untreated cells (negative control) and cells  
856 treated with gramicidin (1 µg/ml, positive control).
- 857 **Supplementary Figure 10:** DiSC(3)5 staining of cells treated with tetracycline (2 µg/ml).
- 858 **Supplementary Figure 11:** DiSC(3)5 staining of cells treated with anhydrotetracycline (2  
859 µg/ml).
- 860 **Supplementary Figure 12:** Inhibition of translation does not cause membrane aberrations.
- 861 **Supplementary Figure 13:** Inhibition of translation does not cause delocalization of the  
862 membrane potential-dependent membrane proteins MinD and MinC.
- 863 **Supplementary Figure 14:** Inhibition of translation does not cause delocalization of  
864 MreB.
- 865 **Supplementary Figure 15:** Inhibition of translation does not diminish fluid membrane  
866 domains.
- 867 **Supplementary Figure 16:** Effect of anhydrotetracycline on tetracycline-resistant strains.

868 **Supplementary Table 1:** Minimal inhibitory concentrations of antimicrobial compounds

869 against *B. subtilis* 168.

870

| compound            | MIC ( $\mu\text{g/ml}$ ) |
|---------------------|--------------------------|
| valinomycin         | 16                       |
| vancomycin          | 0.5                      |
| ampicillin          | 0.5                      |
| daptomycin          | 1                        |
| MP196               | 32                       |
| nitrofurantoin      | 8                        |
| tetracycline        | 8                        |
| anhydrotetracycline | 4                        |

871

872 **Supplementary Table 2:** Bacterial strains used in this study.

873

| strain name                   | relevant genotype                                     | induction                   | reference  |
|-------------------------------|-------------------------------------------------------|-----------------------------|------------|
| <i>B. subtilis</i> 168        | -                                                     |                             | (63)       |
| <i>B. subtilis</i> MW17       | <i>sepF::spc aprE::kan Pspac-sepF</i>                 | 1 mM IPTG                   | this study |
| <i>B. subtilis</i> LB318      | <i>amyE::spc mgfp-minD aprE::cat<br/>mcherry-minC</i> | 0.1 mM IPTG,<br>0.1% xylose | (37)       |
| <i>B. subtilis</i><br>TNVS205 | <i>aprE::cat-Pspac-mcherry-mreB</i>                   | 0.3 mM IPTG                 | this study |
| <i>B. subtilis</i> PG112      | <i>tet-4</i>                                          | -                           | (45)       |
| <i>B. subtilis</i> SG82       | <i>lacA::tet</i>                                      | -                           | (45)       |
| <i>E. coli</i> MG1655         | -                                                     | -                           | (65)       |
| <i>M. bovis</i> BCG Tice      | -                                                     | -                           | (64)       |
| <i>A. laidlawii</i> PG-8A     | -                                                     | -                           | (66)       |

874



875 **Supplementary Table 3:** Primer sequences.

876

| name    | sequence                                                              |
|---------|-----------------------------------------------------------------------|
| MW135   | GGCGTTAGCCCAAGCGC                                                     |
| MW139   | ACACCCCCTGTTTCATTTCCCTAGCAGGTCAATTGTGAGCGC                            |
| MW140   | GGAAATGAAACAGGGGGTGTACAGCAATGAGTATGAAAAATAAACTG<br>AAAAACTTTTTCTCAATG |
| MW141   | GCGCTTGGGCTAACGCCTTACCACCTCTGATGTTTCGTCTTCAGATATG                     |
| TerS135 | GGGCGTTAGCCCAAGCGCATCA                                                |
| TerS337 | CATGTCTGTGCAGGCTGCCGGA                                                |
| TerS338 | CGGCAGCCTGCACAGACATGTT                                                |
| TerS397 | GGCTCAGGAAGCGGCTCAGGATCCATGTTTGGGAATTGGTGCTAGAGAC<br>CT               |
| TerS398 | GGATCCTGAGCCGCTTCCTGAGCCTTTGTATAATTCGTCCATTCCACCT                     |
| TerS400 | ATGCGCTTGGGCTAACGCCCCCGATTATCTAGTTTTCCCTTTGA                          |

877

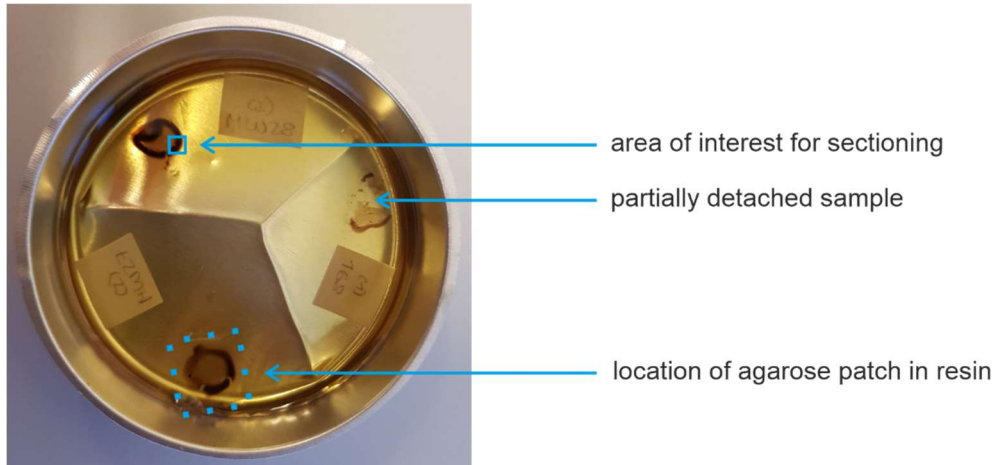

878

879

880 **Supplementary Figure 1:** Example of a polymerized EPON disc after flat embedding.

881 The samples shown are from 150  $\mu$ l logarithmically growing *B. subtilis* cultures that were  
882 pelleted and resuspended in 15  $\mu$ l LB. The whole 15  $\mu$ l cell suspension was spread on an  
883 agarose patch and embedded according to the single agarose layer protocol. The aluminium  
884 dish can be removed from the EPON disc and an area of interest can be cut out with a hot  
885 scalpel and mounted on a conventional EPON block for ultrathin sectioning. From these  
886 sample volumes, a minimum of 5 sectioning blocks can be prepared. Nicely aligned cells  
887 can typically be found in the middle of the sample or close to the dark halo. Within the  
888 halo itself, cells were more prone to overlap with each other, resulting in less complete  
889 longitudinally cut cells in the final sections. However, for low concentrated samples,  
890 certain mutants, and partially lysing cultures we made the experience that the dark halo  
891 gives better sections than the center of the spot. Therefore, we typically select an area of  
892 interest that contains both areas. Disc diameter 7 cm.

893

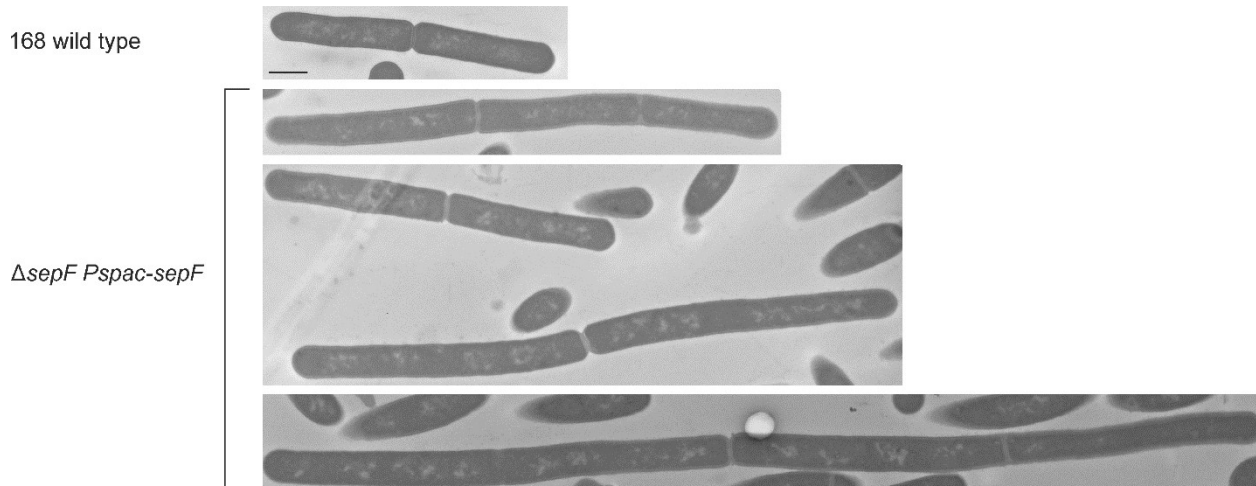

896 **Supplementary Figure 2:** Flat embedding of filamentous cells. Overexpression of the cell  
897 division protein SepF inhibits cell division by preventing septum formation (67). Strain  
898 MW17 (*B. subtilis* 168 *sepF::spc aprE::kan Pspac-sepF*) carries an IPTG-inducible copy  
899 of the *sepF* gene in the ectopic *aprE* locus. Induction with 0.5 mM IPTG results in  
900 elongated cells (67). Scale bar 1  $\mu$ m.

901

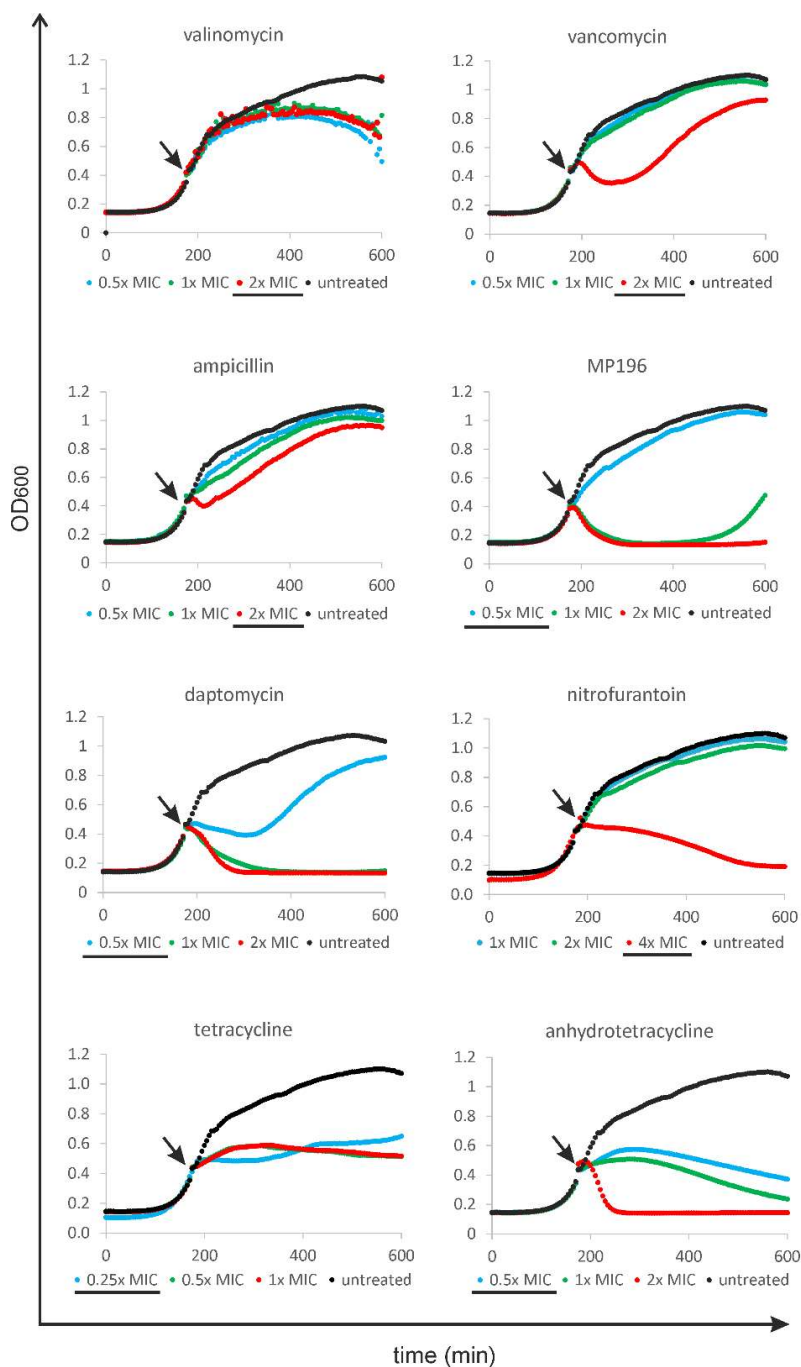

902

903 **Supplementary Figure 3:** Growth of *B. subtilis* 168 after treatment with different  
904 antibiotic concentrations. Arrows indicate time points of antibiotic addition.  
905 Concentrations used for further experiments are underlined.

906

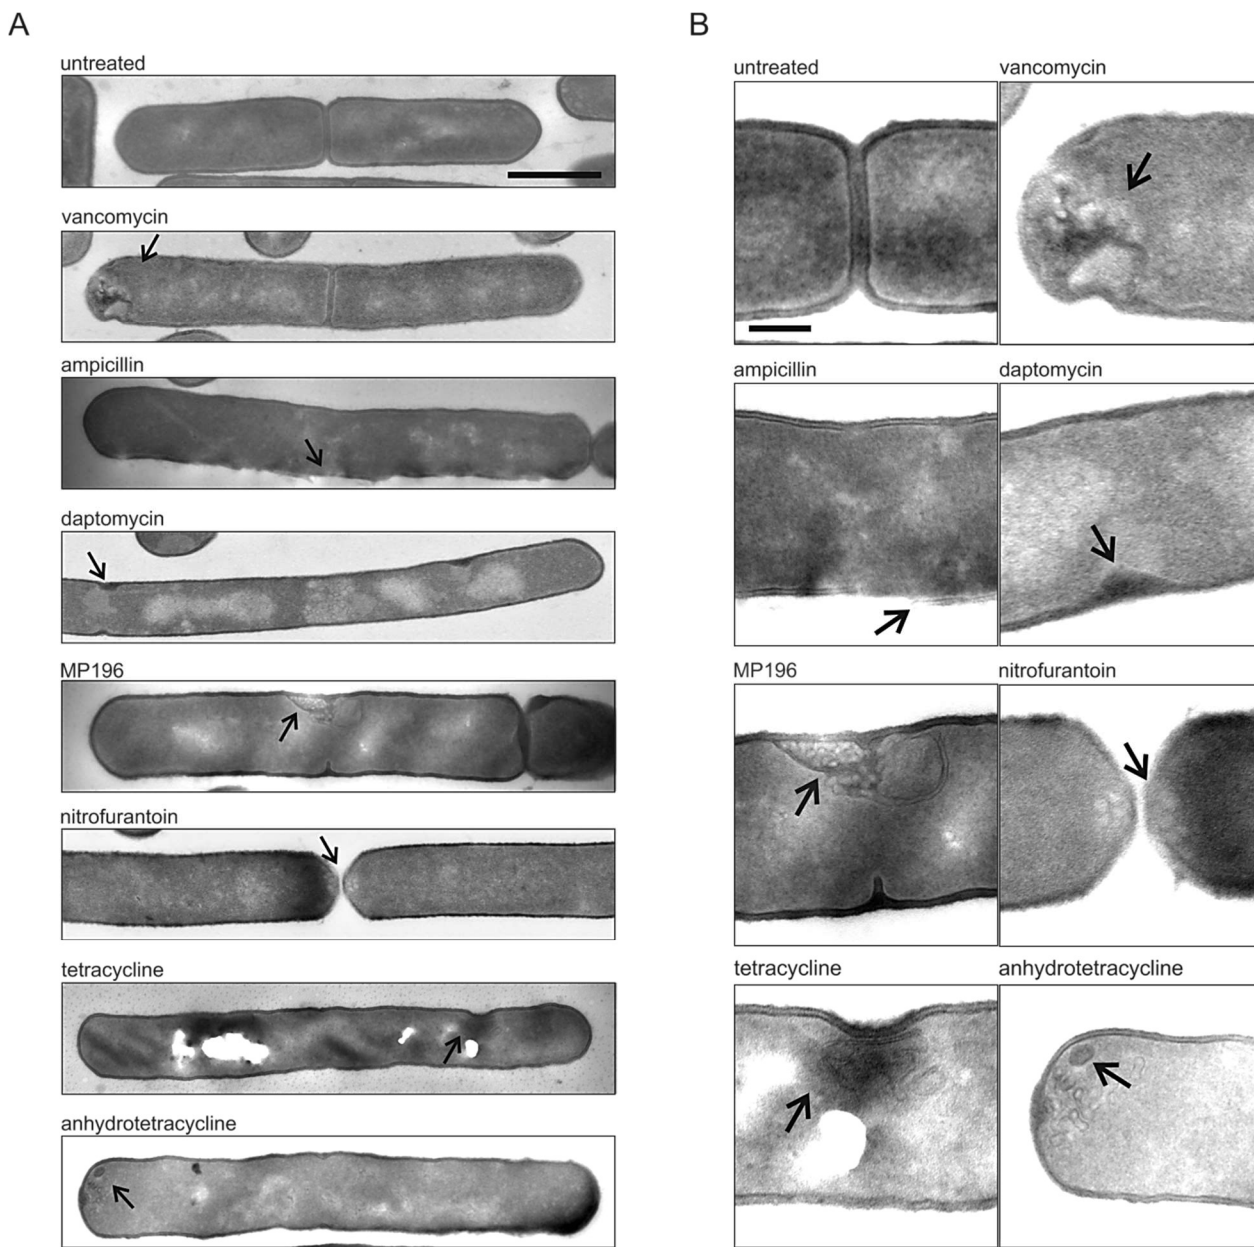

907

908

909 **Supplementary Figure 4:** Electron micrographs (A) and detail images (B) of *B. subtilis*  
910 cells treated with different antibiotics for 30 min. Antibiotic-induced lesions are indicated  
911 by arrows. We mainly chose antibiotics that target the cell wall and should cause clearly  
912 visible cell wall defects. Vancomycin binds to the cell wall precursor molecule lipid II and

913 thus inhibits cell wall synthesis. Cells treated with this antibiotic show clear cell wall  
914 lesions. Ampicillin inhibits transpeptidation of peptidoglycan polymers (21), causing cell  
915 wall thinning and ultimately cell lysis (68). Accordingly, ampicillin-treated cells displayed  
916 partly disintegrated cell walls. Daptomycin was recently shown to hamper cell wall  
917 synthesis by targeting membrane microdomains that harbor the cell wall synthetic  
918 machinery, causing them to accumulate into lipid II-enriched foci (40, 69). In line,  
919 daptomycin-treated cells showed aberrant local cell wall thickening. The antimicrobial  
920 peptide MP196 caused intracellular cell wall structures and membrane vesicles, reflecting  
921 its dual mechanism of targeting membrane function and cell wall synthesis (6).  
922 Nitrofurantoin is thought to kill cells by an unspecific mechanism involving oxidative  
923 damage (23). Cells treated with this antibiotic lacked a nucleoid and showed membrane  
924 aberrations, which is consistent with oxidative damage to these cellular structures.  
925 Tetracycline inhibits the bacterial ribosome (10). Surprisingly, we consistently observed  
926 membrane lesions in tetracycline-treated cells. Anhydrotetracycline, an analogue of  
927 tetracycline, which is thought to rather target the cell membrane than the ribosome (32),  
928 caused similar lesions. Scale bars 1  $\mu\text{m}$  (A) and 250  $\mu\text{m}$  (B).  
929



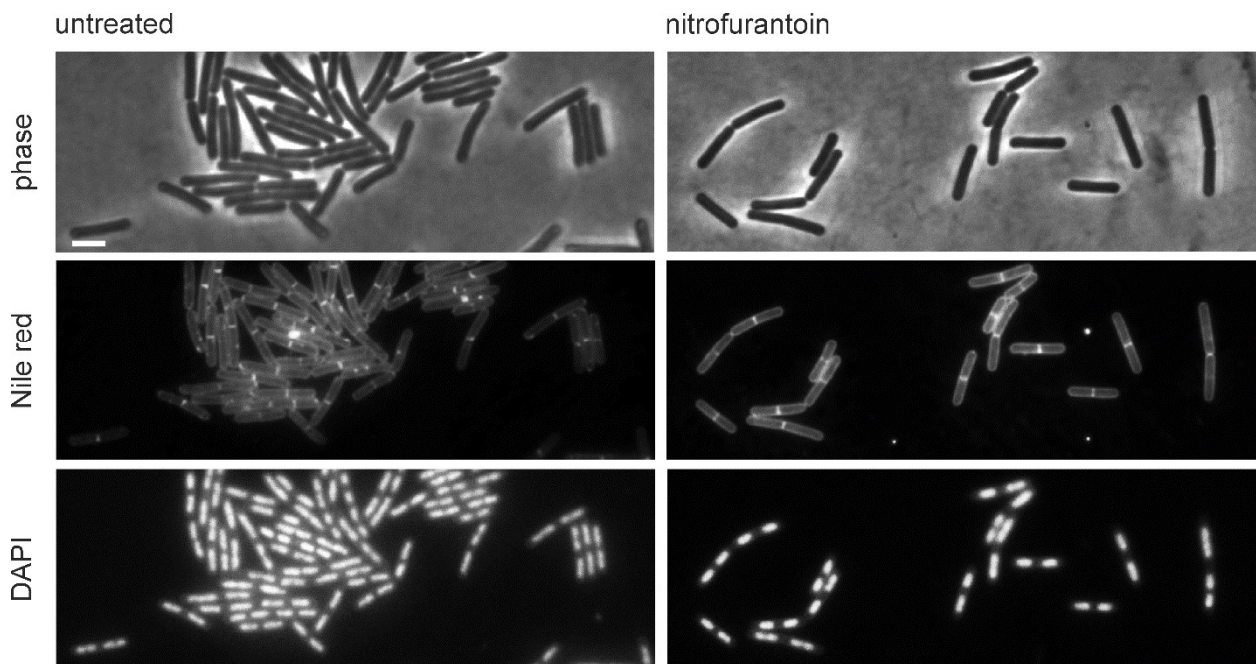

930

931

932 **Supplementary Figure 5:** Effects of 5 min treatment with nitrofurantoin on the nucleoid.

933 Scale bar 2  $\mu$ m.

934

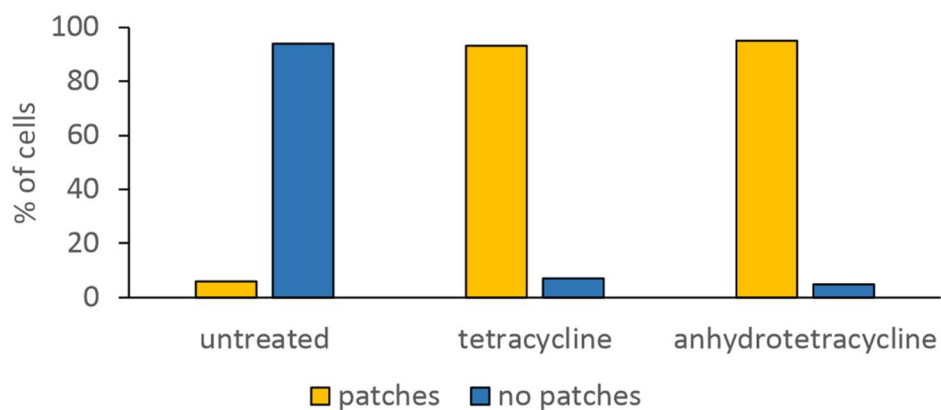

935

936

937 **Supplementary Figure 6:** Quantification of fluorescence microscopy images. Cells were  
938 inspected for the presence of Nile red-stained fluorescent membrane patches. A minimum  
939 of 100 cells were evaluated per condition.

940



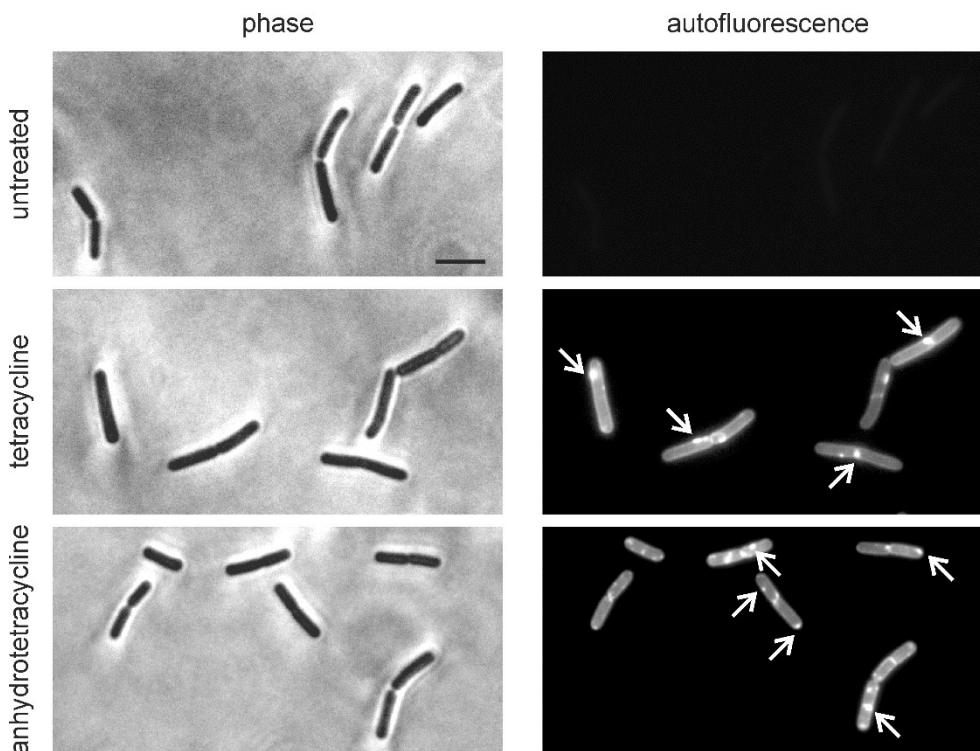

943 **Supplementary Figure 7:** Localization of tetracycline and anhydrotetracycline in *B.*  
944 *subtilis* 168. Green autofluorescence of the tetracyclines allows label-free localization of  
945 these antibiotics in living cells. Arrows indicate some sites of compound accumulations in  
946 the cell membrane. Scale bar 2  $\mu\text{m}$ .

947

948

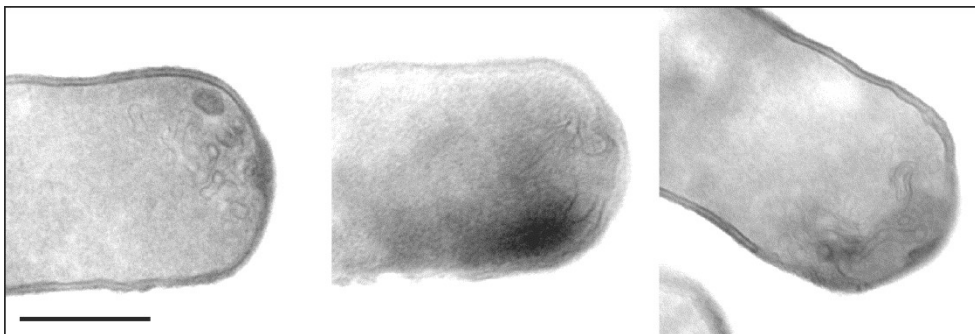

949

950

951 **Supplementary Figure 8:** Exemplary lesions caused by anhydrotetracycline. Scale bar

952 500 nm.

953

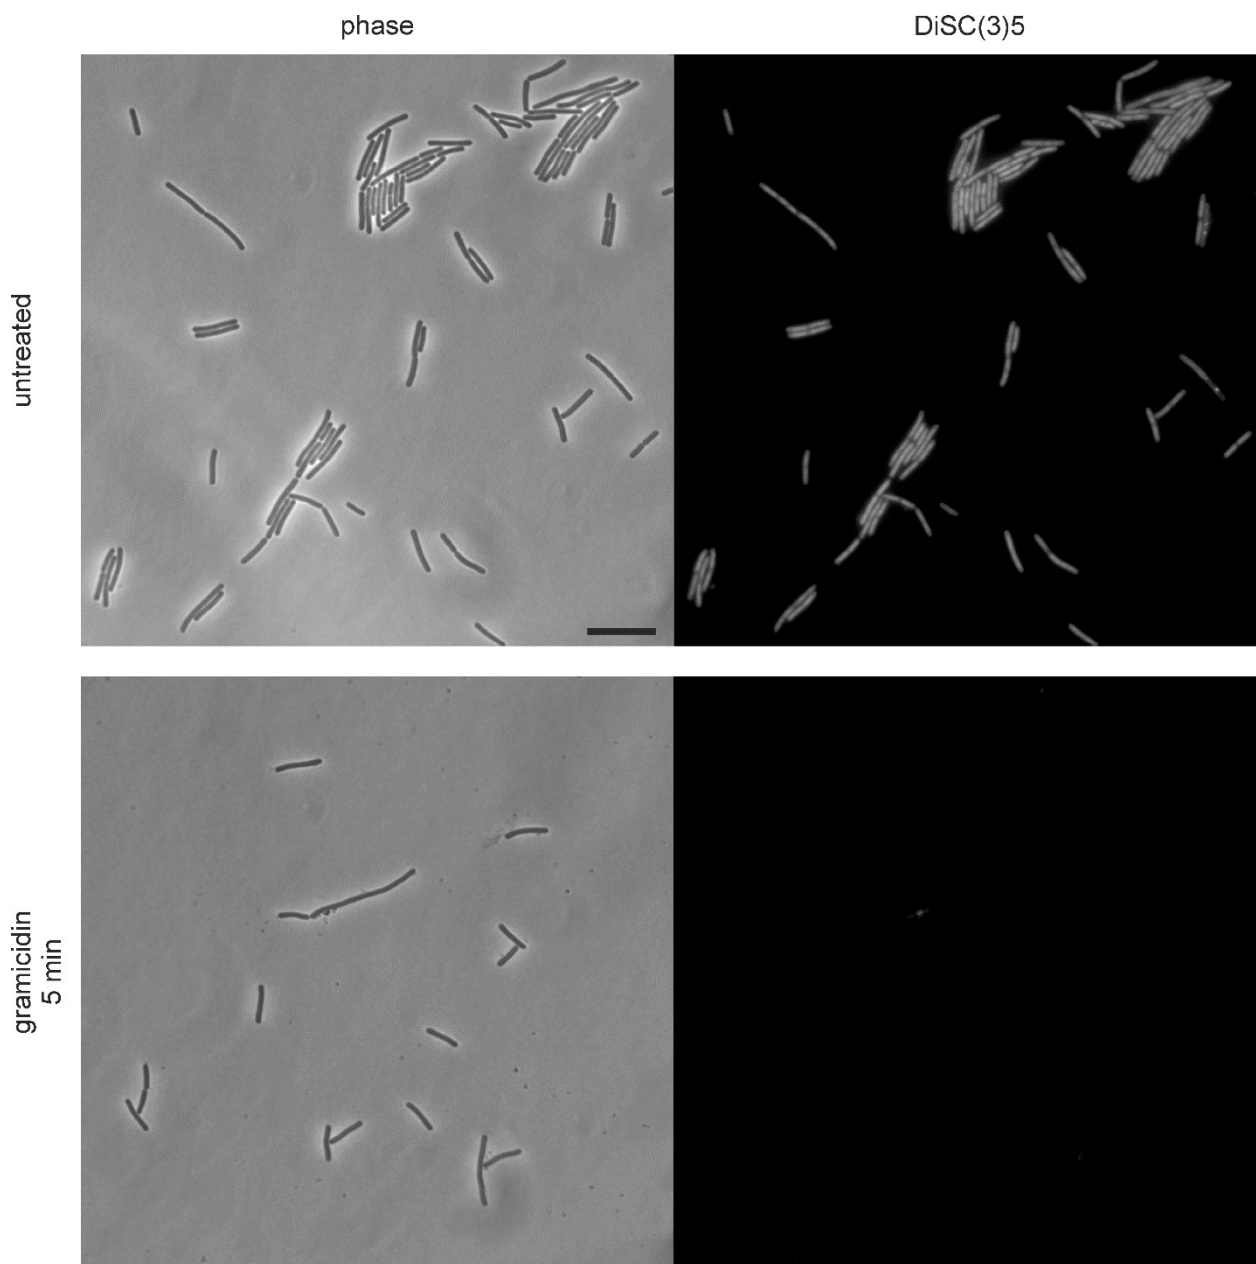

954

955

956 **Supplementary Figure 9:** DiSC(3)5 staining of untreated cells (negative control) and cells  
957 treated with gramicidin (1  $\mu\text{g/ml}$ , positive control). A fluorescence signal indicates the  
958 presence of a membrane potential (negative control: untreated cells). Depolarization leads  
959 to release of the dye from the cells and a diminished fluorescence signal in the cells

960 (positive control: gramicidin). All fluorescence pictures in Supplementary Figure 9-11  
961 have been recorded with the same exposure time and were adjusted with the same  
962 brightness and contrast settings. Scale bar 10  $\mu\text{m}$ .  
963

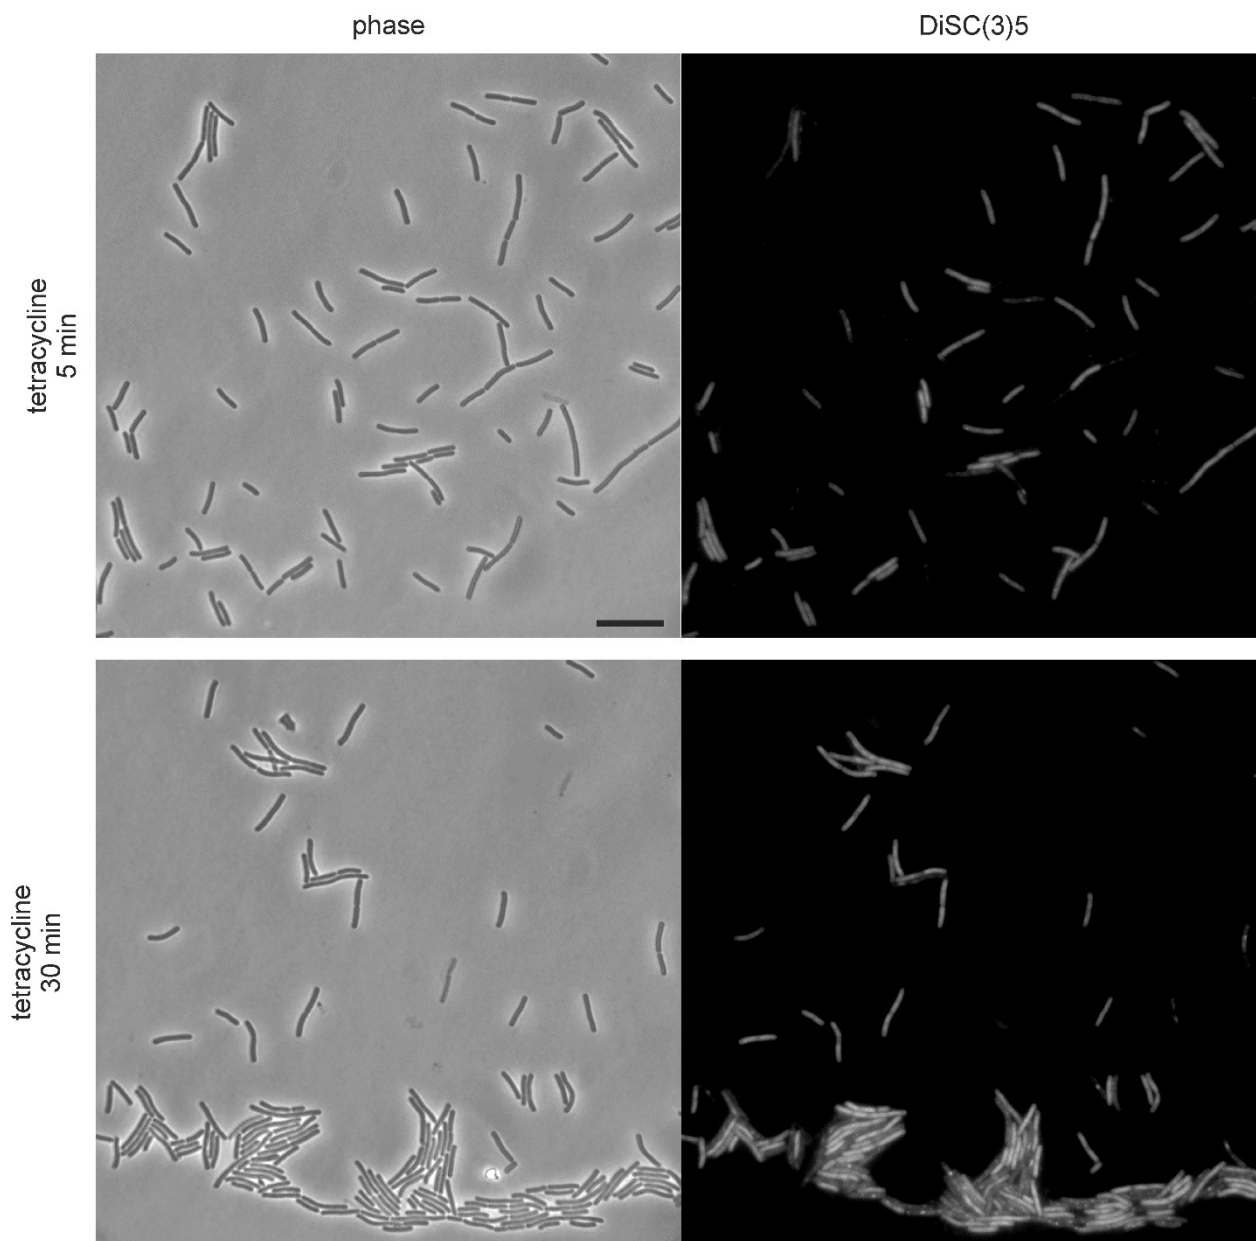

966 **Supplementary Figure 10:** DiSC(3)5 staining of cells treated with tetracycline (2  $\mu\text{g}/\text{ml}$ ).

967 Note the heterogeneity in the DiSC(3)5 staining. A fluorescence signal indicates the

968 presence of a membrane potential. Depolarization leads to release of the dye from the cells

969 and a diminished fluorescence signal in the cells. All fluorescence pictures in

970 Supplementary Figure 9-11 have been recorded with the same exposure time and were

971 adjusted with the same brightness and contrast settings. Scale bar 10  $\mu\text{m}$ .

972



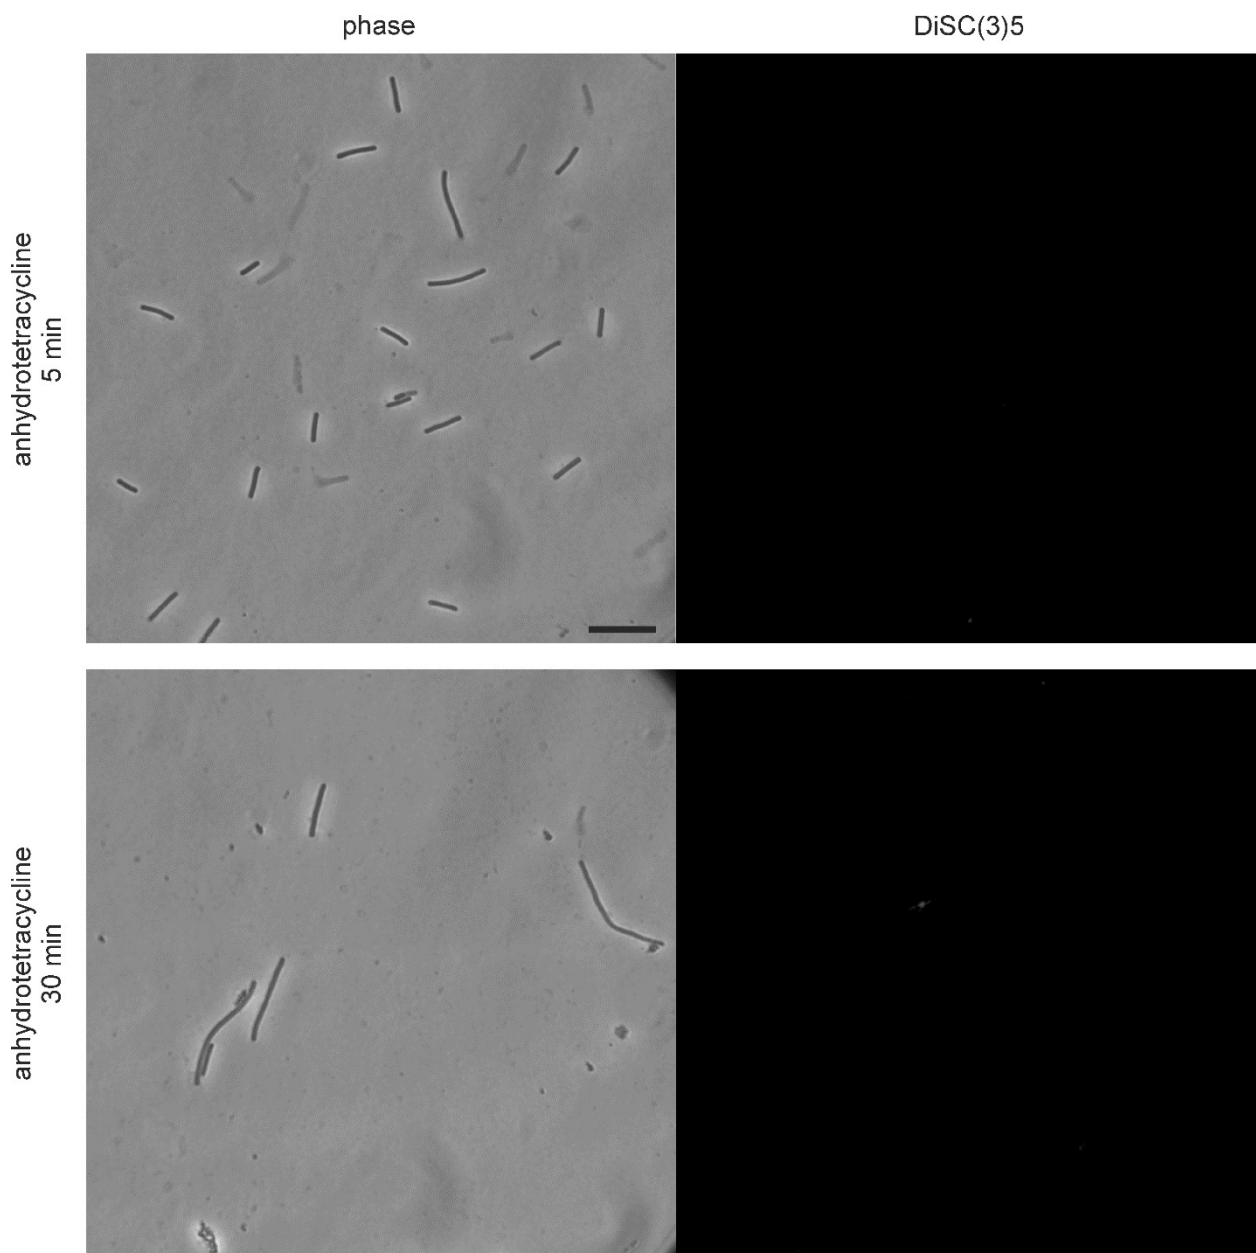

973

974

975 **Supplementary Figure 11:** DiSC(3)5 staining of cells treated with anhydrotetracycline (2

976  $\mu\text{g/ml}$ ). A fluorescence signal indicates the presence of a membrane potential.

977 Depolarization leads to release of the dye from the cells and a diminished fluorescence

978 signal in the cells. All fluorescence pictures in Supplementary Figure 9-11 have been

979 recorded with the same exposure time and were adjusted with the same brightness and  
980 contrast settings. Scale bar 10  $\mu\text{m}$ .

untreated

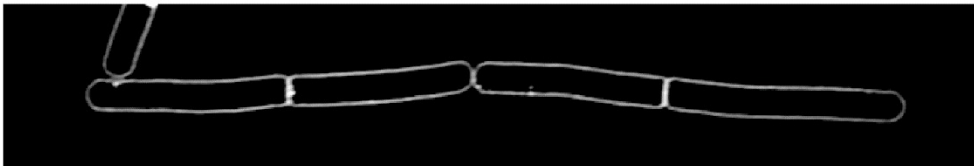

chloramphenicol

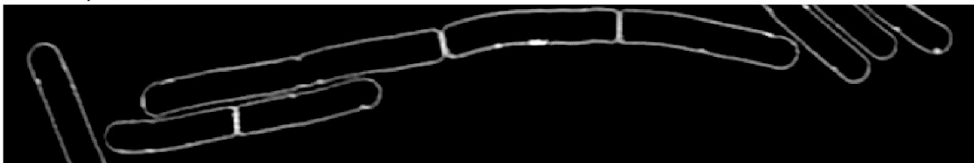

kanamycin

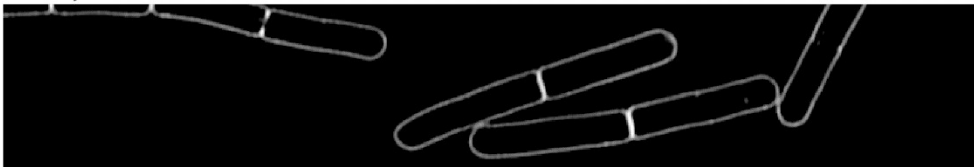

981

982

983 **Supplementary Figure 12:** Inhibition of translation does not cause membrane aberrations.

984 Logarithmically growing *B. subtilis* 168 cultures were treated with 15  $\mu\text{g/ml}$

985 chloramphenicol or 3  $\mu\text{g/ml}$  kanamycin for 20 min, stained with Nile red, and examined

986 by SIM microscopy.

987



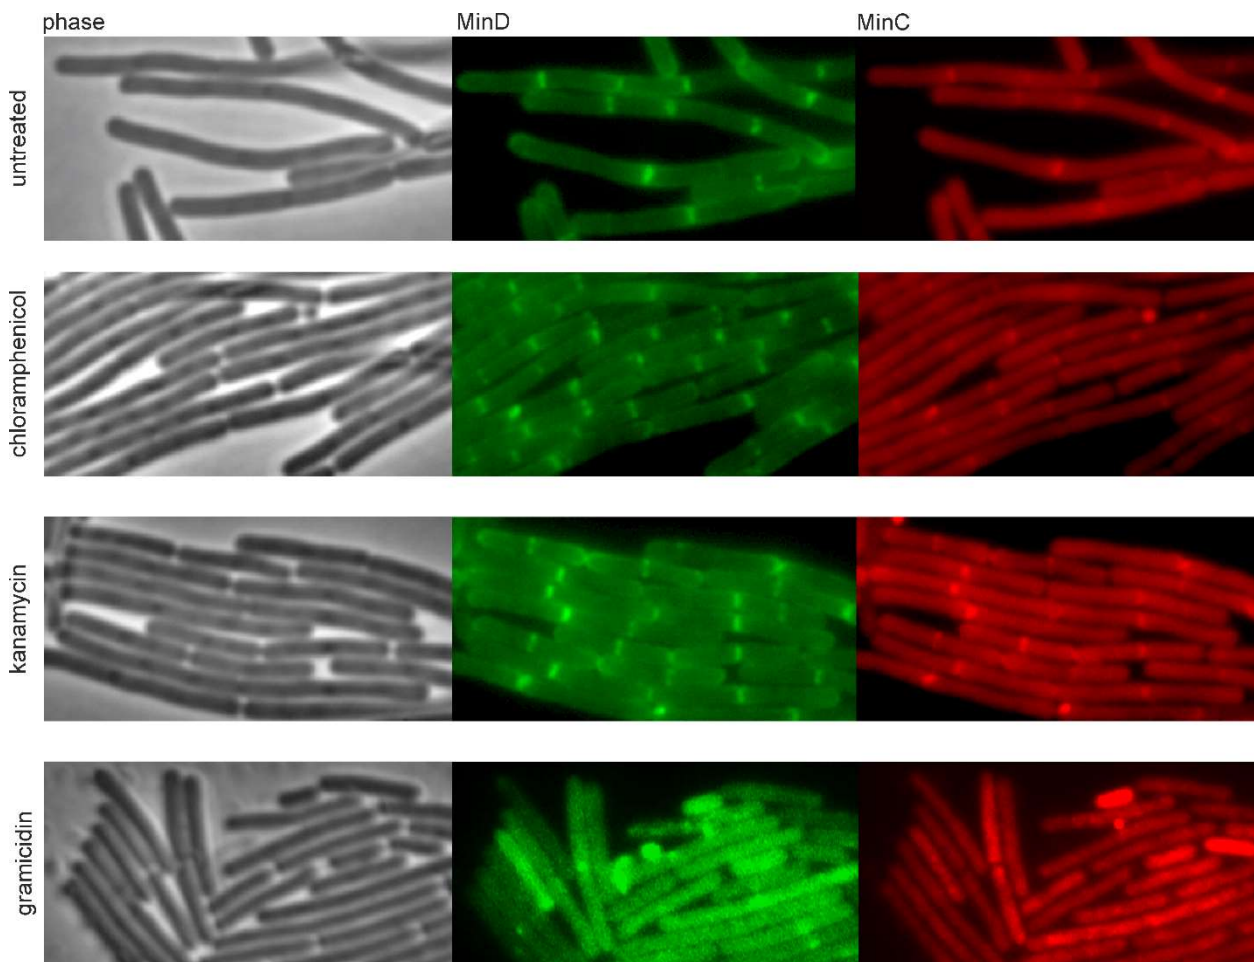

988

989

990 **Supplementary Figure 13:** Inhibition of translation does not cause delocalization of the  
991 membrane potential-dependent membrane proteins MinD and MinC. *B. subtilis* LB318,  
992 expressing GFP-MinD and mCherry-MinC, was treated with 20  $\mu\text{g/ml}$  chloramphenicol,  
993 10  $\mu\text{g/ml}$  kanamycin, or 1  $\mu\text{g/ml}$  gramicidin for 20 min prior to microscopy. Note that  
994 LB318 carries both a chloramphenicol and kanamycin resistance cassette. Therefore, twice  
995 the concentrations used for antibiotic selection was chosen for microscopy.

996

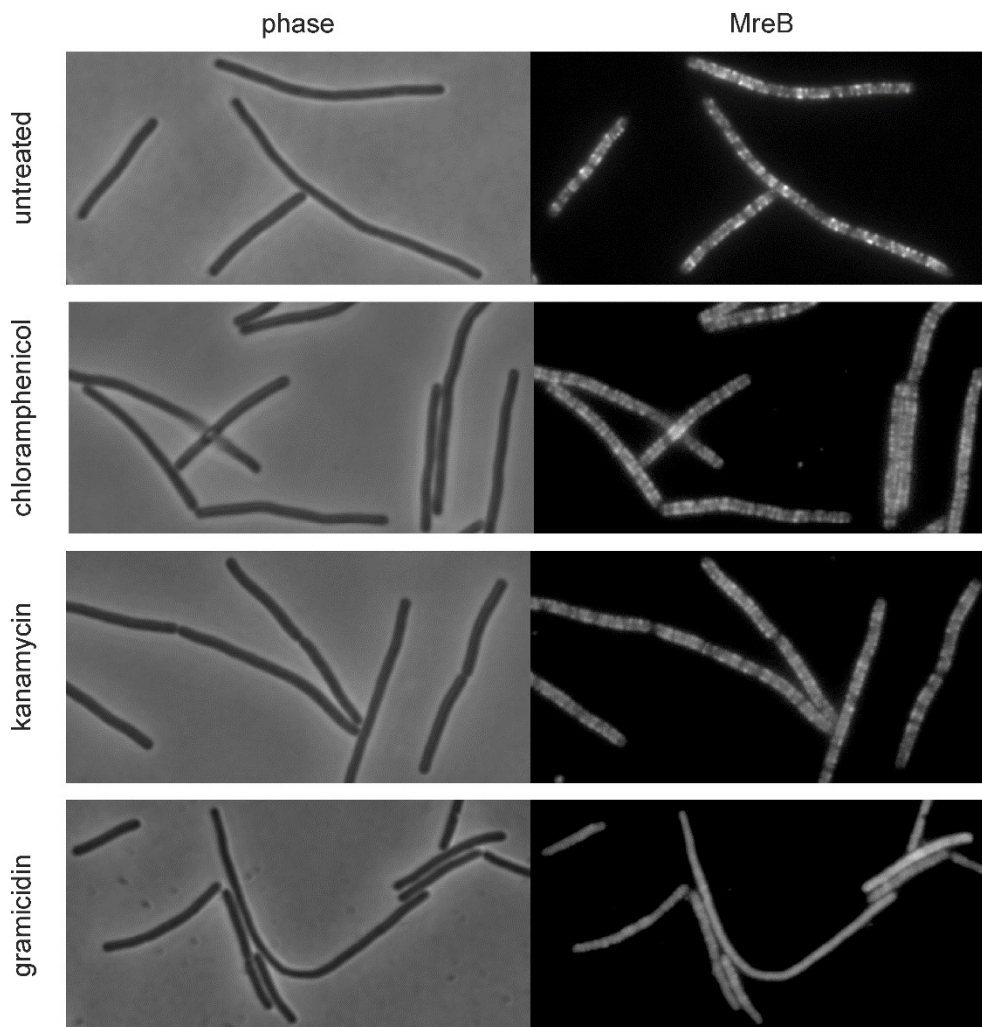

997

998

999 **Supplementary Figure 14:** Inhibition of translation does not cause delocalization of  
1000 MreB. *B. subtilis* TNVS205, expressing mCherry-MreB, was treated with 20  $\mu\text{g/ml}$   
1001 chloramphenicol, 3  $\mu\text{g/ml}$  kanamycin, or 1  $\mu\text{g/ml}$  gramicidin for 20 min prior to  
1002 microscopy. Note that TNVS205 carries a chloramphenicol resistance cassette. Therefore,  
1003 twice the concentration used for antibiotic selection was chosen for microscopy.

1004

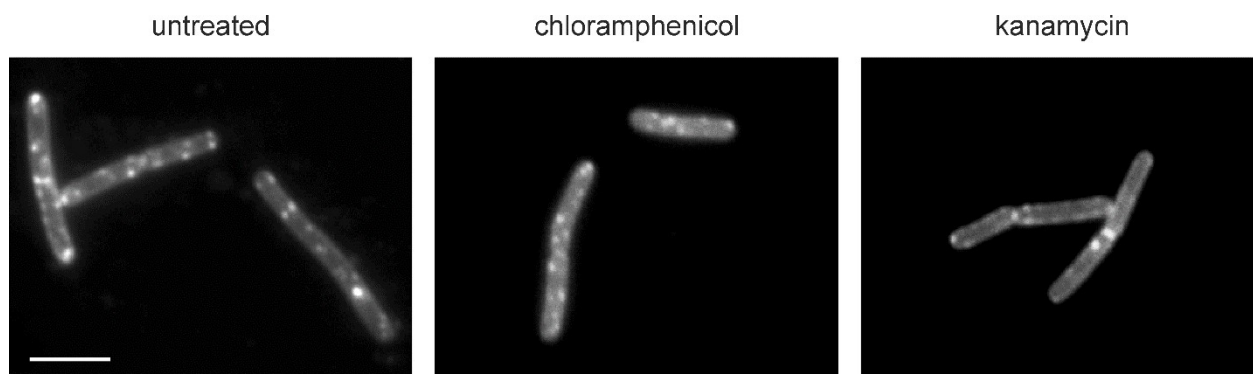

1005

1006

1007 **Supplementary Figure 15:** Inhibition of translation does not diminish fluid membrane  
1008 domains. *B. subtilis* 168 was treated with 15  $\mu\text{g/ml}$  chloramphenicol or 3  $\mu\text{g/ml}$  kanamycin  
1009 30 min prior to microscopy. Small effects are expected since RIFs depend on the growth  
1010 phase (29) and a reduced growth rate caused by antibiotic treatment is likely to have  
1011 secondary effects on RIFs. In line, RIFs were less clear after 30 min treatment with  
1012 chloramphenicol and kanamycin compared to the untreated control. However, clustering  
1013 or diminishing of RIFs was not observed. Scale bar 2  $\mu\text{m}$ .

1014

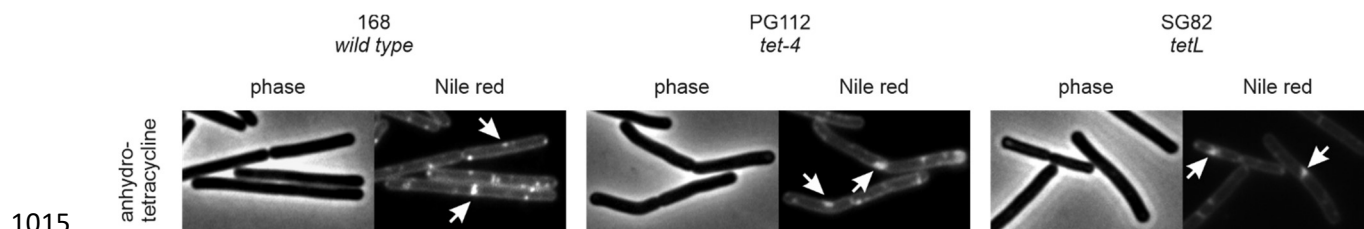

1017 **Supplementary Figure 16:** Effect of anhydrotetracycline on tetracycline-resistant strains.

1018 Anhydrotetracycline is insensitive to both *tet-4* and *tetL* resistance mechanisms (MIC 1

1019  $\mu\text{g/ml}$  for both PG112 and SG82).

1020
